# Supplementary material for: GPR68-ATF4 signaling is a novel prosurvival pathway in glioblastoma activated by acidic extracellular microenvironment
Source: PubMed Central journal article supplement (PMC10829393; doi:10.1186/s40164-023-00468-1), 2024-01-31
Supplement: 40164_2023_468_MOESM2_ESM.pdf [file 40164_2023_468_MOESM2_ESM.pdf]

**A**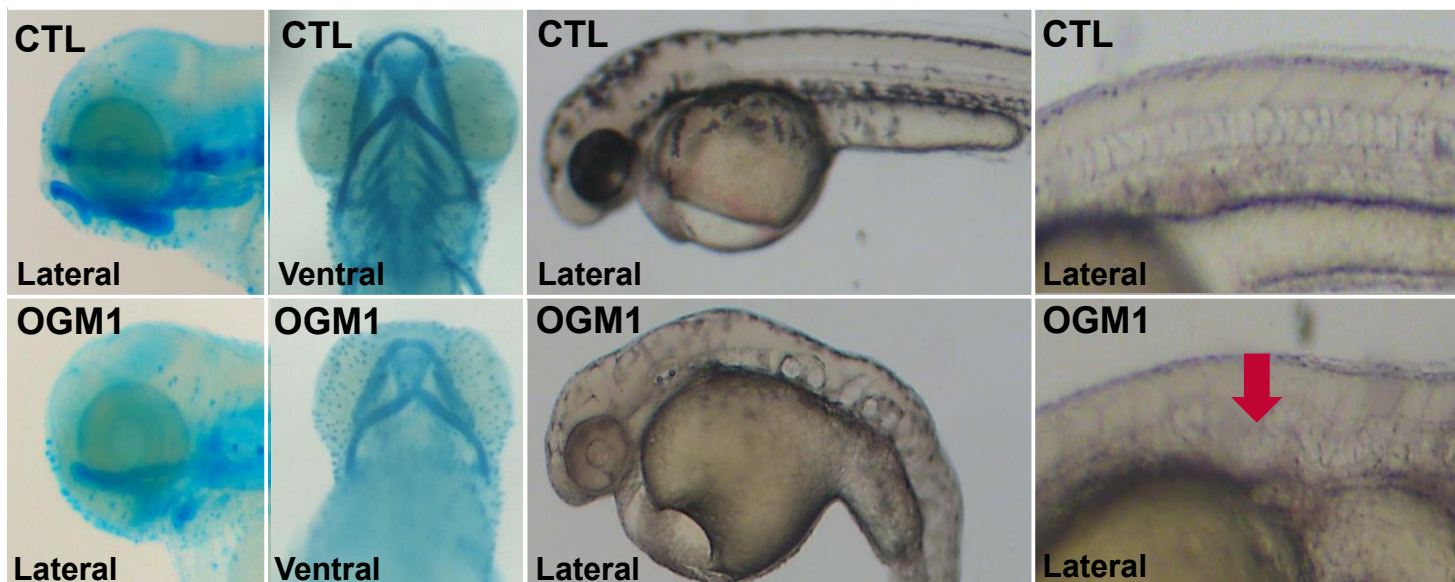**B**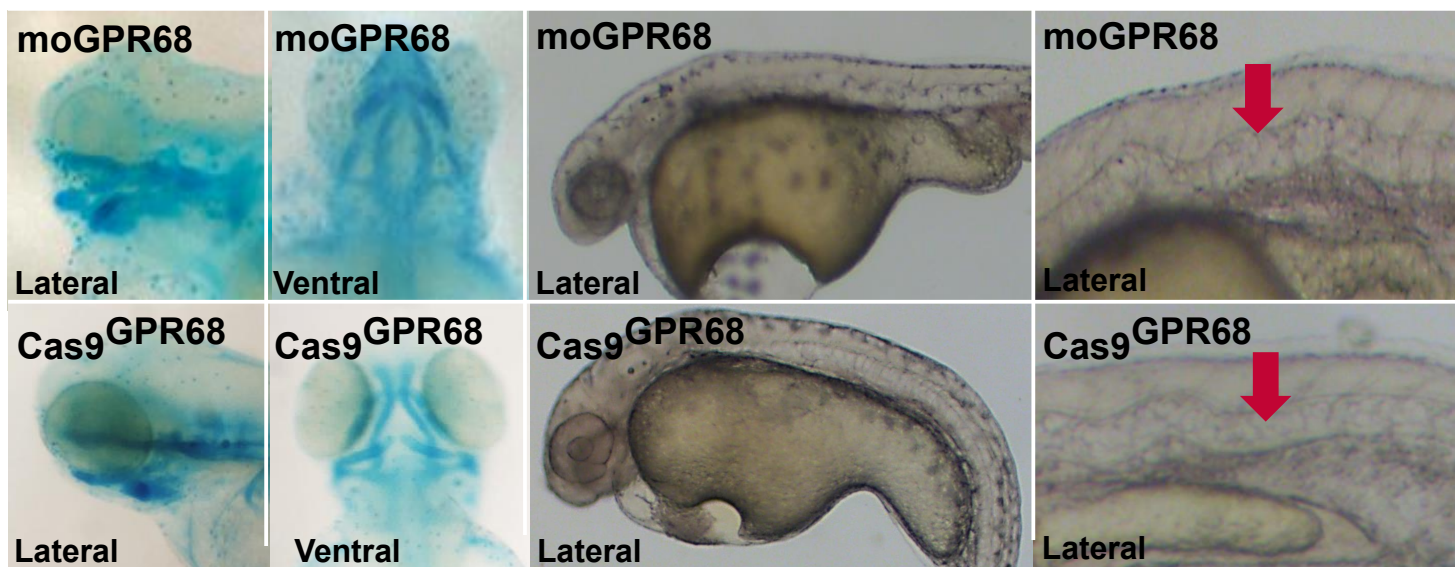

**A**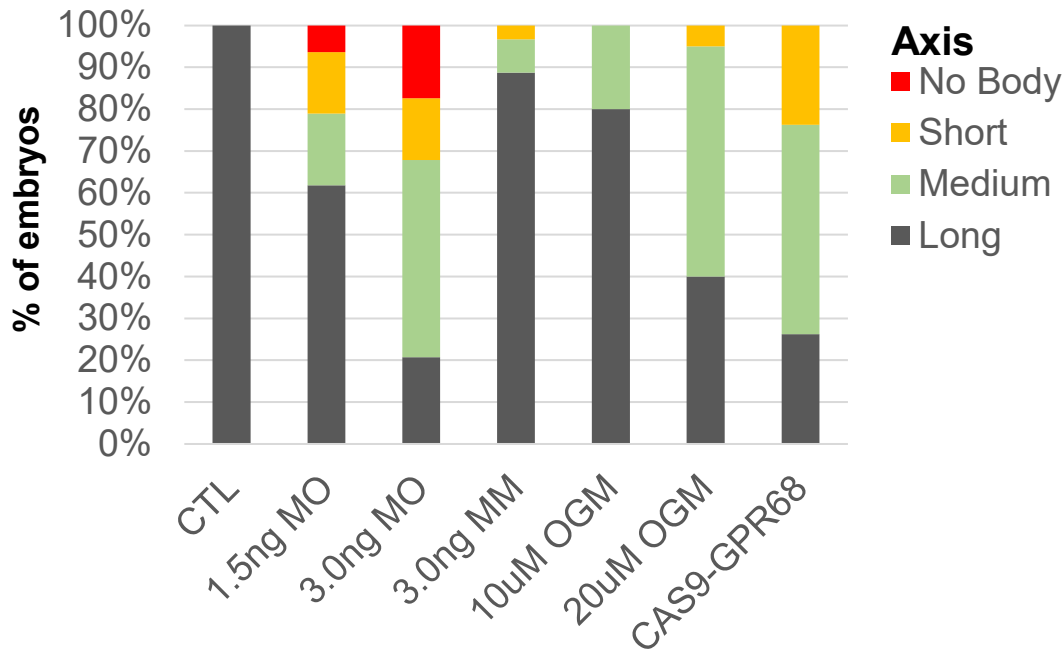**B**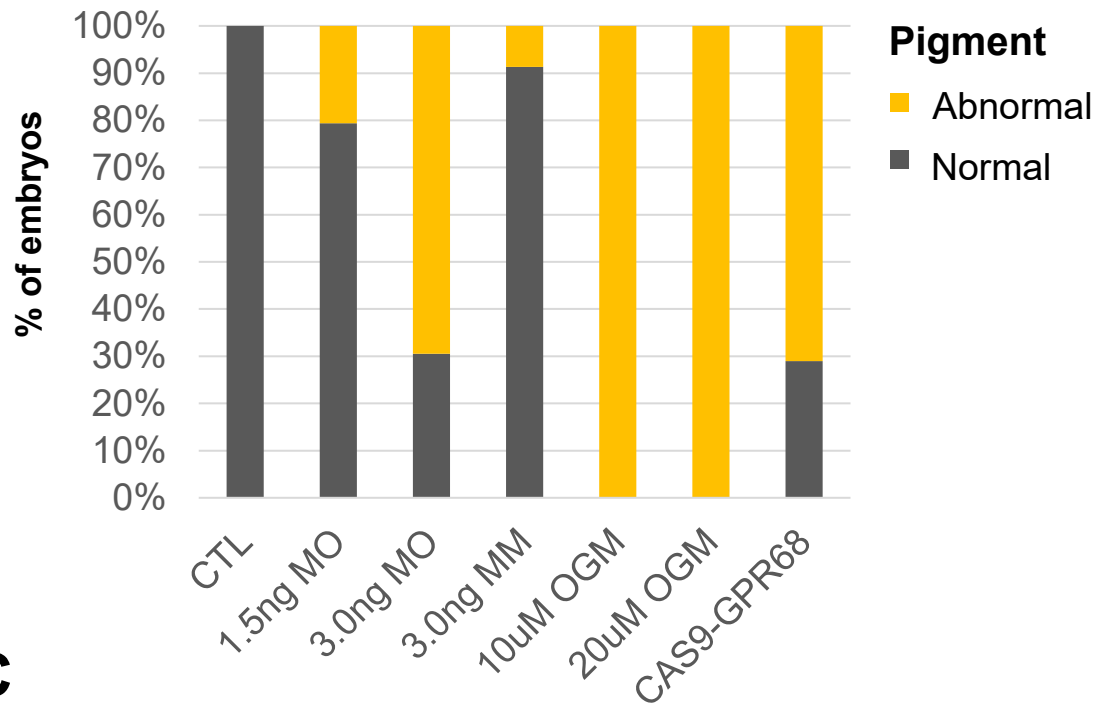**C**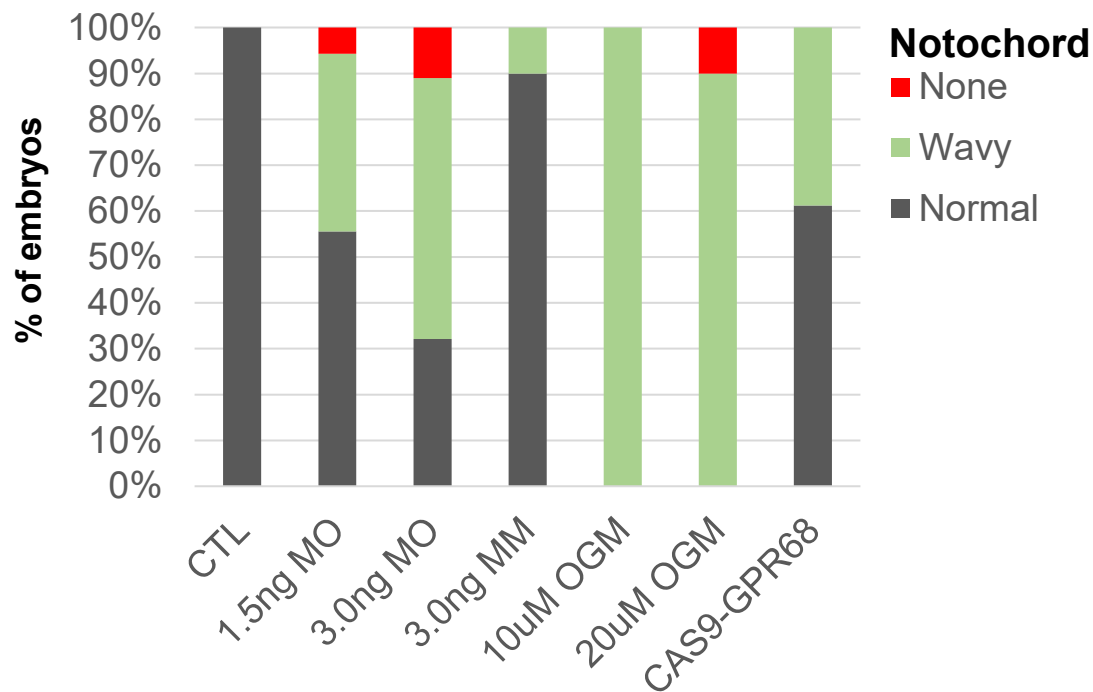

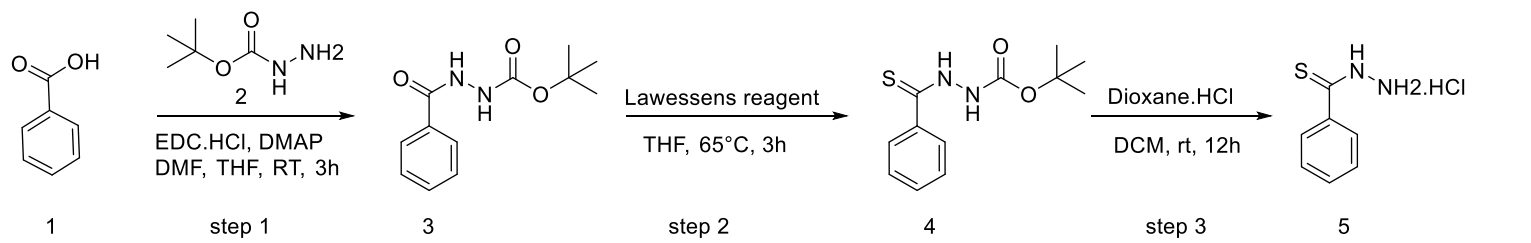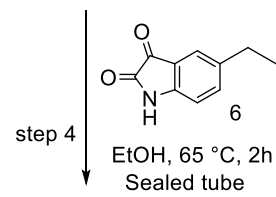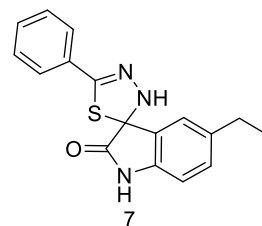

**A**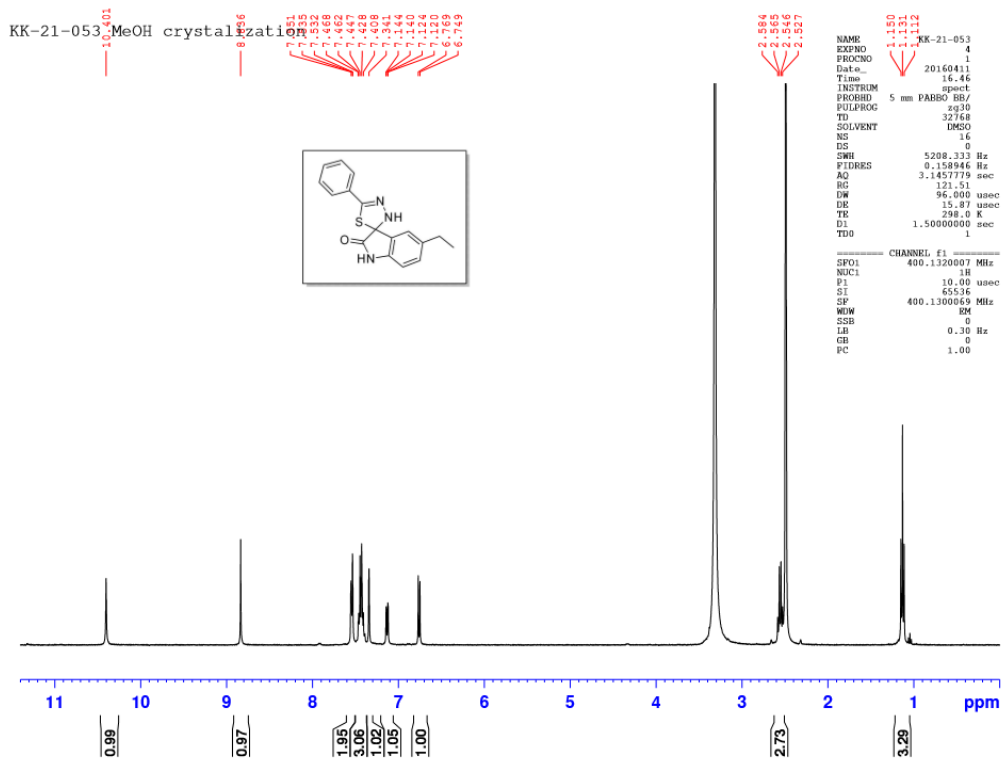**B**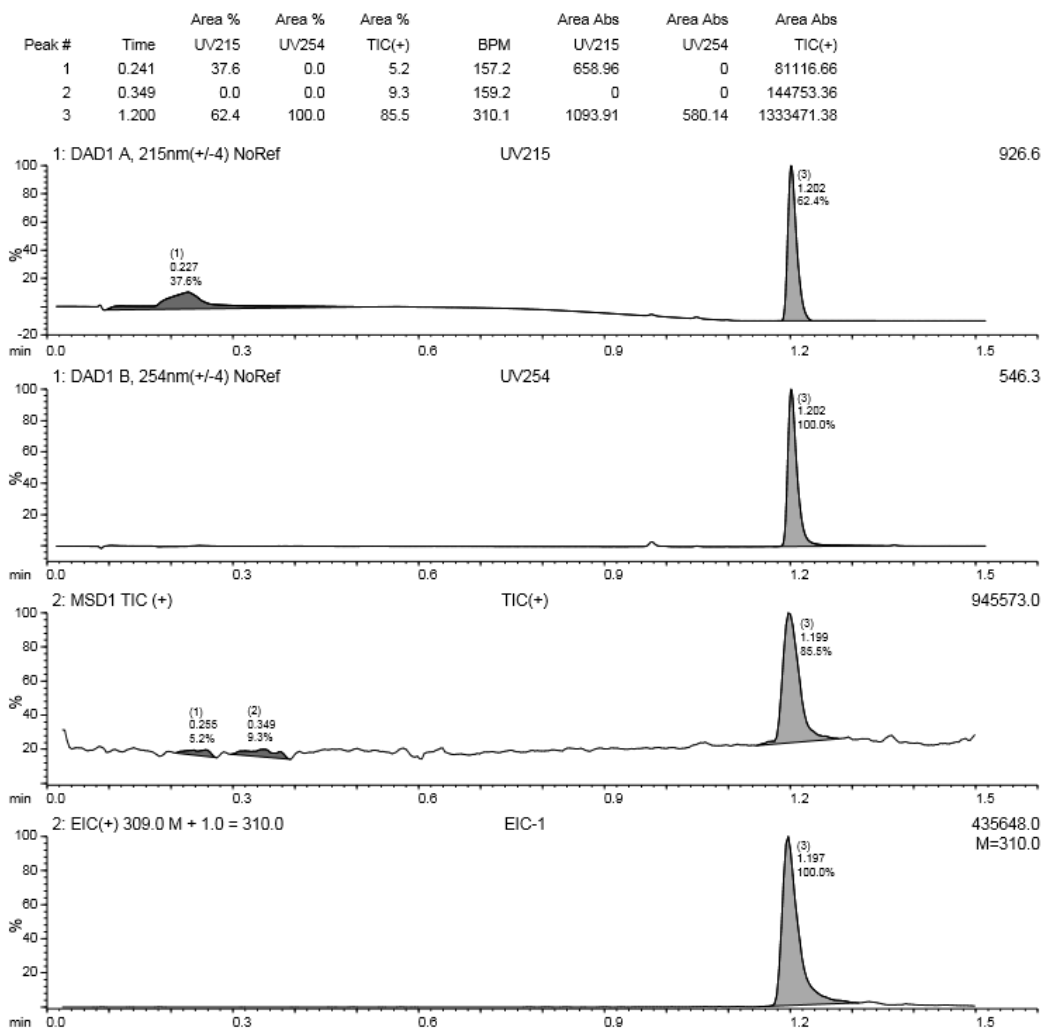

Figure S4



**A**

|                        | Identity % (AA) | Similarity % (AA) |
|------------------------|-----------------|-------------------|
| Hs. GPR65 vs. Dr.GPR65 | 39              | 58.8              |
| Hs. GPR68 vs. Dr.GPR68 | 58.3            | 75.2              |
| Hs. GPR4 vs. Dr.GPR4   | 74.1            | 85.2              |

**B**

|          | Dr.GPR65 | Dr.GPR68 | Dr.GPR4 |
|----------|----------|----------|---------|
| Dr.GPR65 | 100      | 28.04    | 30.61   |
| Dr.GPR68 | 28.04    | 100      | 41.45   |
| Dr.GPR4  | 30.61    | 41.45    | 100     |

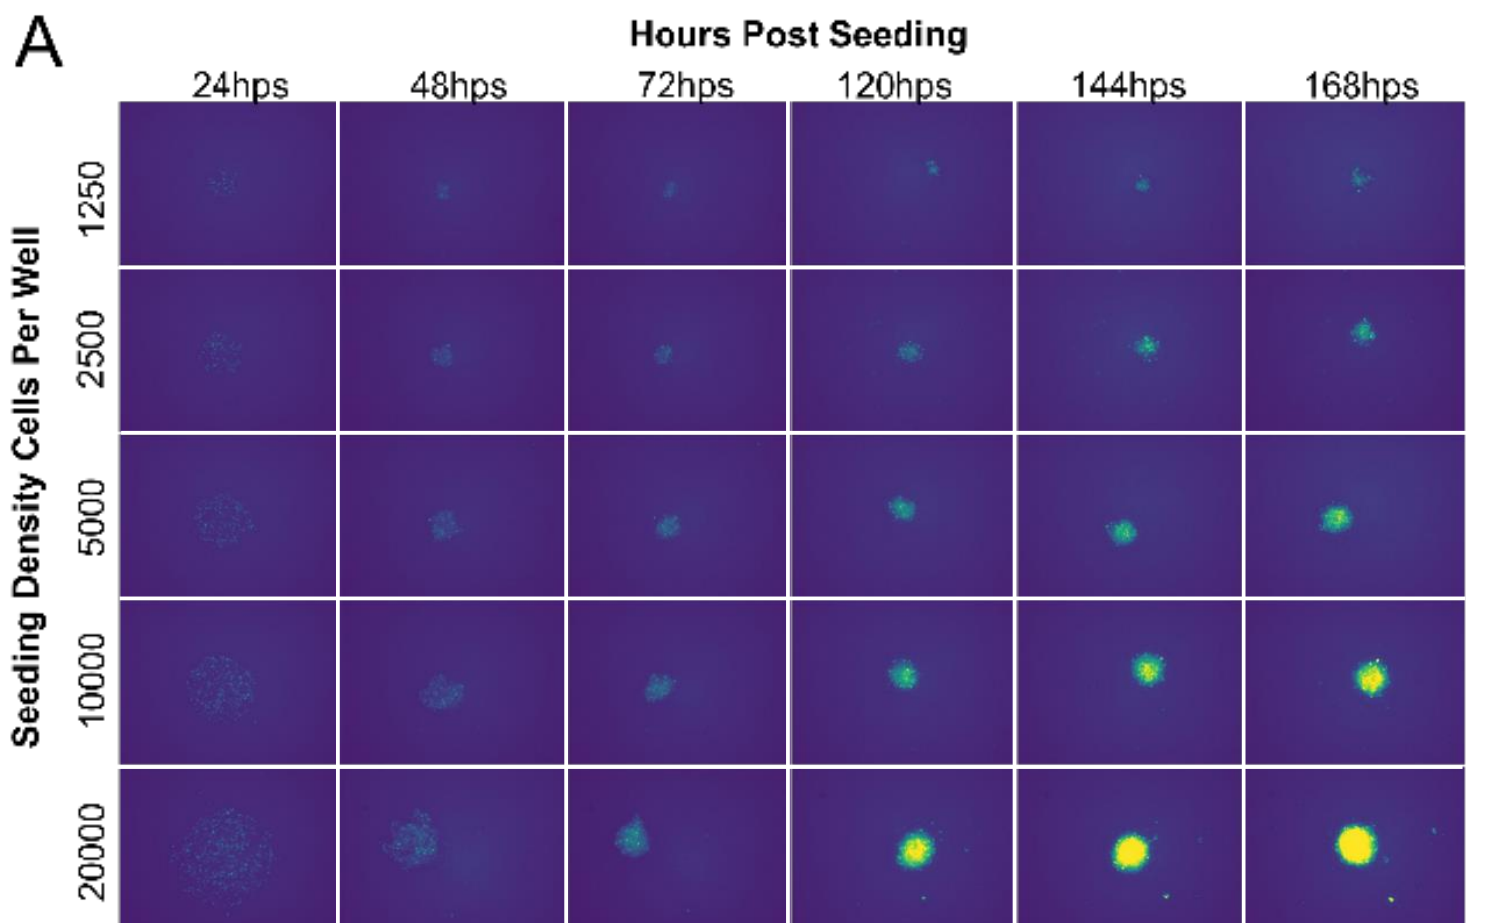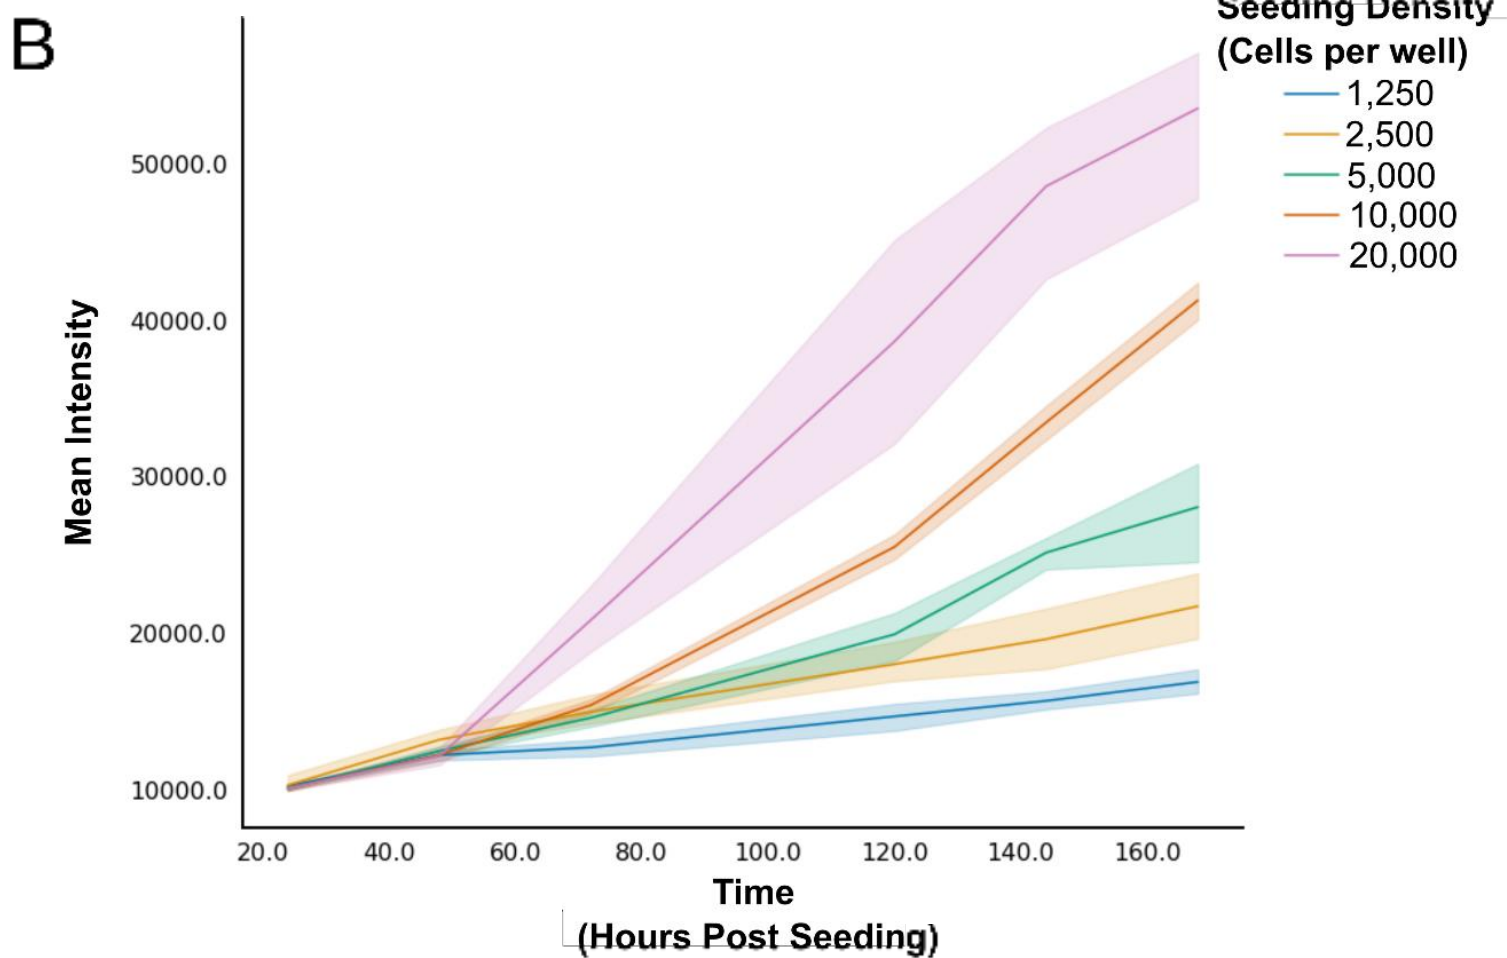

Figure S6

**A**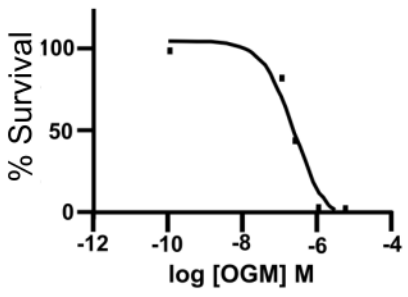**B**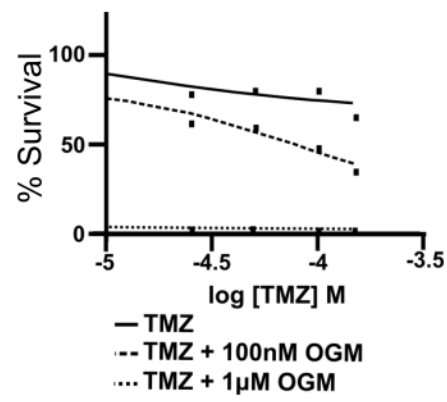**C**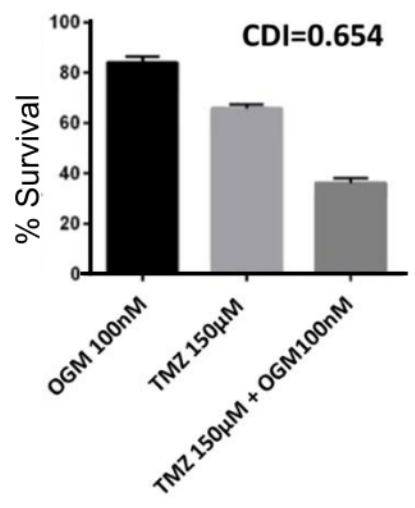

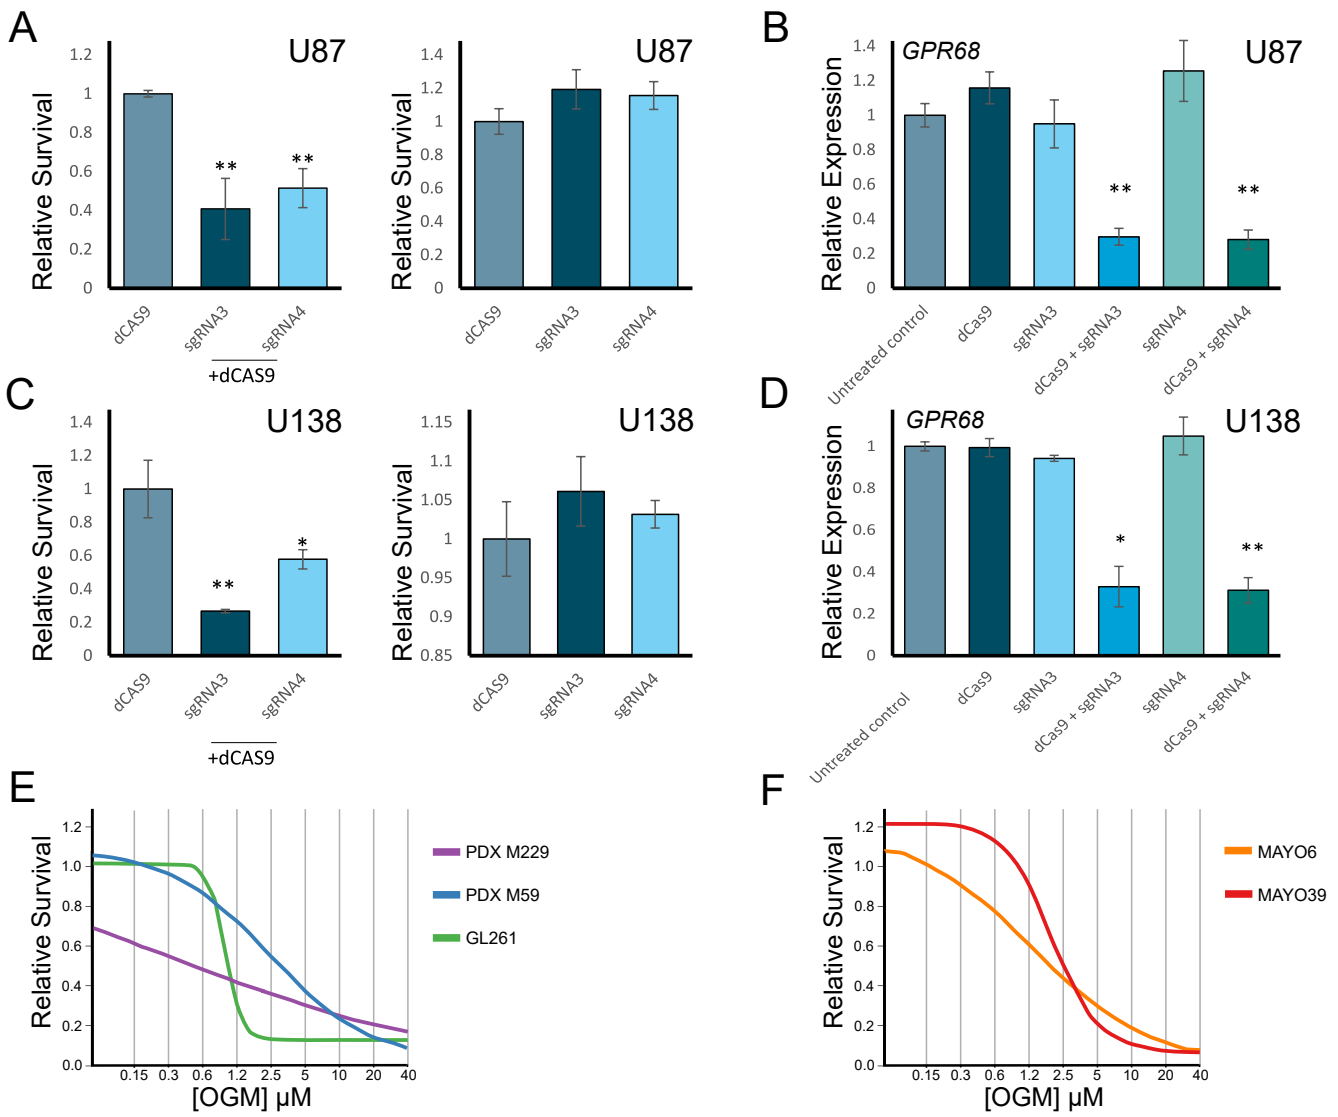

Figure S8

| GBM Cells   | Species | Sex | TMZ sensitivity | Molecular subtype | EGFR amplification | EGFR Mutation | TP53      | LC <sub>50</sub> (μM) |
|-------------|---------|-----|-----------------|-------------------|--------------------|---------------|-----------|-----------------------|
| U87         | Human   | M   | Sensitive (1)   | Mesenchymal       | WT (2)             | WT (2)        | WT (3)    | 0.75                  |
| U138        | Human   | M   | Resistant (4)   | Mesenchymal       | WT(5)              | WT(5)         | MT (6)    | 0.92                  |
| 913 (7)     | Human   | M   | Resistant (8)   | UNK               | Amplified (9)      | WT (9)        | MT (10)   | 0.45                  |
| 08-387      | Human   | UNK | Resistant (11)  | UNK               | UNK                | UNK           | UNK       | 0.42                  |
| 3691        | Human   | UNK | UNK             | UNK               | UNK                | UNK           | UNK       | 0.43                  |
| 1079        | Human   | UNK | UNK             | UNK               | UNK                | UNK           | UNK       | 1.99                  |
| PDX-M6 (12) | Human   | M   | Resistant (12)  | Classical (12)    | Amplified (12)     | VIII (12)     | WT (12)   | 2.7                   |
| PDZ-M28     | Human   | M   | Resistant (12)  | UNK (12)          | WT (12)            | WT (12)       | LOSS (12) | 0.73                  |
| PDX-M39     | Human   | M   | Sensitive (12)  | Mesenchymal (12)  | Amplified (12)     | VIII (12)     | WT (12)   | 0.49                  |
| PDX-M59     | Human   | F   | Sensitive (12)  | Mesenchymal (12)  | Amplified (12)     | VIII (12)     | LOSS (12) | 0.55                  |
| PDX-M229    | Human   | F   | Resistant (12)  | UNK (12)          | WT (12)            | WT (12)       | WT (12)   | 0.43                  |
| KT158-Luc   | Mouse   | UNK | Resistant (13)  | UNK               | UNK                | WT            | UNK       | 0.78                  |
| GL261-Luc   | Mouse   | UNK | Sensitive (13)  | UNK               | UNK                | WT            | UNK       | 0.39                  |

(1) Baer JC, Freeman AA, Newlands ES, Watson AJ, Rafferty JA, Margison GP. Depletion of O6-alkylguanine-DNA alkyltransferase correlates with potentiation of temozolomide and CCNU toxicity in human tumour cells. *Br J Cancer*. 1993 Jun;67(6):1299-302. doi: 10.1038/bjc.1993.241 PMID: 8512814; PMCID: PMC1968485.

(2) Liu F, Hon GC, Villa GR, Turner KM, Ikegami S, Yang H, Ye Z, Li B, Kuan S, Lee AY, Zanca C, Wei B, Lucey G, Jenkins D, Zhang W, Barr CL, Furnari FB, Cloughesy TF, Yong WH, Gahman TC, Shiau AK, Cavenee WK, Ren B, Mischel PS. EGFR Mutation Promotes Glioblastoma through Epigenome and Transcription Factor Network Remodeling. *Mol Cell*. 2015 Oct 15;60(2):307-18. doi: 10.1016/j.molcel.2015.09.002. Epub 2015 Oct 8. PMID: 26455392; PMCID: PMC4609298.

(3) Sesen J, Dahan P, Scotland SJ, Saland E, Dang VT, Lemarié A, Tyler BM, Brem H, Toulas C, Cohen-Jonathan Moyal E, Sarry JE, Skuli N. Metformin inhibits growth of human glioblastoma cells and enhances therapeutic response. *PLoS One*. 2015 Apr 13;10(4):e0123721. doi: 10.1371/journal.pone.0123721. PMID: 25867026; PMCID: PMC4395104.

(4) Grogan PT, Sarkaria JN, Timmermann BN, Cohen MS. Oxidative cytotoxic agent withaferin A resensitizes temozolomide-resistant glioblastomas via MGMT depletion and induces apoptosis through Akt/mTOR pathway inhibitory modulation. *Invest New Drugs*. 2014 Aug;32(4):604-17. doi: 10.1007/s10637-014-0084-7. Epub 2014 Apr 10. PMID: 24718901; PMCID: PMC4380174.

(5) Guo D, Hildebrandt IJ, Prins RM, Soto H, Mazzotta MM, Dang J, Czernin J, Shyy JY, Watson AD, Phelps M, Radu CG, Cloughesy TF, Mischel PS. The AMPK agonist AICAR inhibits the growth of EGFRVIII-expressing glioblastomas by inhibiting lipogenesis. *Proc Natl Acad Sci U S A*. 2009 Aug 4;106(31):12932-7. doi: 10.1073/pnas.0906606106. Epub 2009 Jul 22. PMID: 19625624; PMCID: PMC2714280.

(6) Wang X, Chen JX, Liu YH, You C, Mao Q. Mutant TP53 enhances the resistance of glioblastoma cells to temozolomide by up-regulating O(6)-methylguanine DNA-methyltransferase. *Neurol Sci*. 2013 Aug;34(8):1421-8. doi: 10.1007/s10072-012-1257-9 Epub 2012 Dec 8. PMID: 23224642.

(7) Galli R, Binda E, Orfanelli U, Cipelletti B, Gritti A, De Vitis S, Fiocco R, Foroni C, Dimeco F, Vescovi A. Isolation and characterization of tumorigenic, stem-like neural precursors from human glioblastoma. *Cancer Res*. 2004 Oct 1;64(19):7011-21. doi: 10.1158/0008-5472.CAN-04-1364. PMID: 15466194.

(8) Xia S, Lal B, Tung B, Wang S, Goodwin CR, Lathera J. Tumor microenvironment tenascin-C promotes glioblastoma invasion and negatively regulates tumor proliferation. *Neuro Oncol*. 2016 Apr;18(4):507-17. doi: 10.1093/neuonc/nov171 Epub 2015 Aug 27. PMID: 26320116; PMCID: PMC4799677.

(9) Gao M, Fu Y, Zhou W, Gui G, Lal B, Li Y, Xia S, Ji H, Eberhart CG, Lathera J, Ying M. EGFR Activates a TAZ-Driven Oncogenic Program in Glioblastoma. *Cancer Res*. 2021 Jul 1;81(13):3580-3592. doi: 10.1158/0008-5472.CAN-20-2773. Epub 2021 Apr 28. PMID: 33910930; PMCID: PMC8277712.

(10) Gampa G, Kenchappa RS, Mohammad AS, Parrish KE, Kim M, Crish JF, Luu A, West R, Hinojosa AQ, Sarkaria JN, Rosenfeld SS, Elmquist WF. Enhancing Brain Retention of a KIF11 Inhibitor Significantly Improves its Efficacy in a Mouse Model of Glioblastoma. *Sci Rep*. 2020 Apr 16;10(1):6524. doi: 10.1038/s41598-020-63494-7. PMID: 32300151; PMCID: PMC7162859.

(11) Tallman MM, Zalenski AA, Deighen AM, Schrock MS, Mortach S, Grubb TM, Kastury PS, Huntoon K, Summers MK, Venere M. The small molecule drug CBL0137 increases the level of DNA damage and the efficacy of radiotherapy for glioblastoma. *Cancer Lett*. 2021 Feb 28;499:232-242. doi: 10.1016/j.canlet.2020.11.027. Epub 2020 Nov 27. PMID: 33253788; PMCID: PMC7779703.

(12) <https://www.mayo.edu/research/labs/translational-neuro-oncology/mayo-clinic-brain-tumor-patient-derived-xenograft-national-resource>

Figure S9

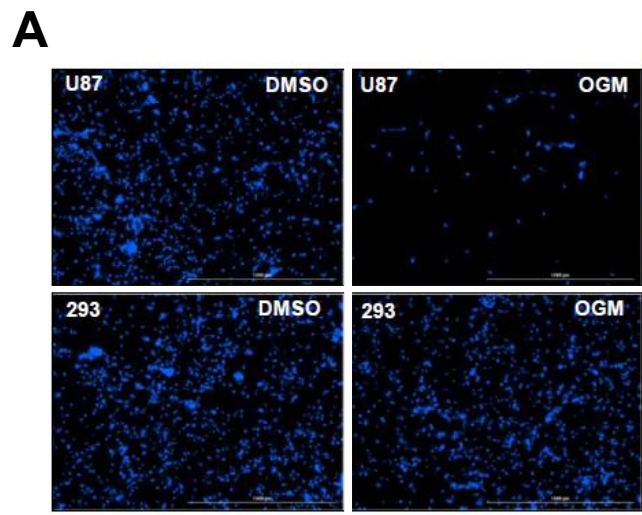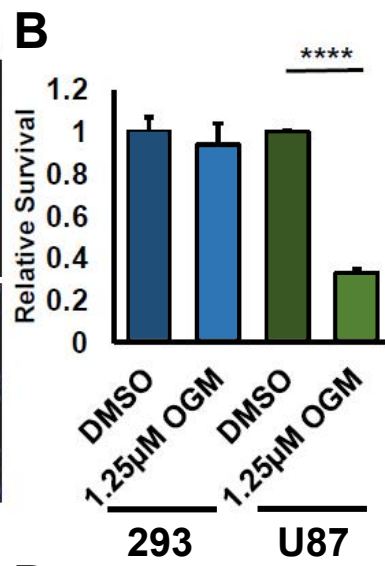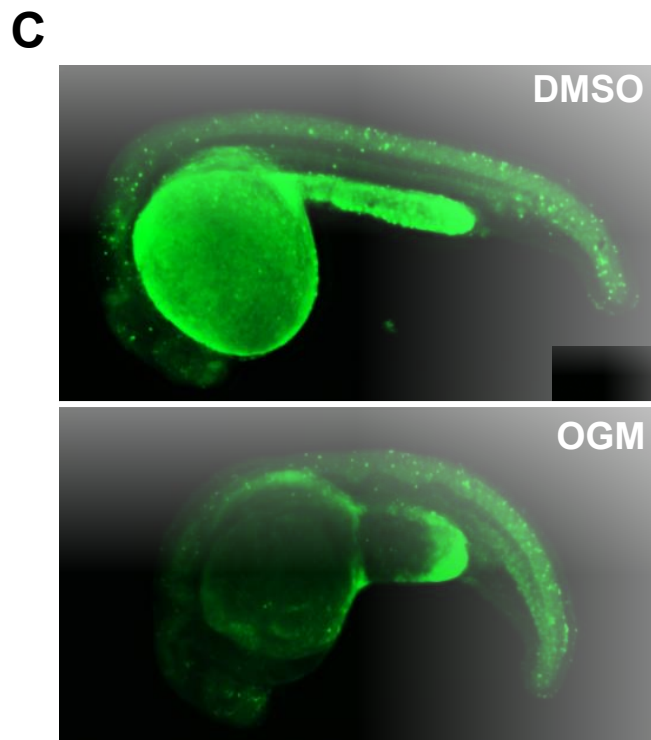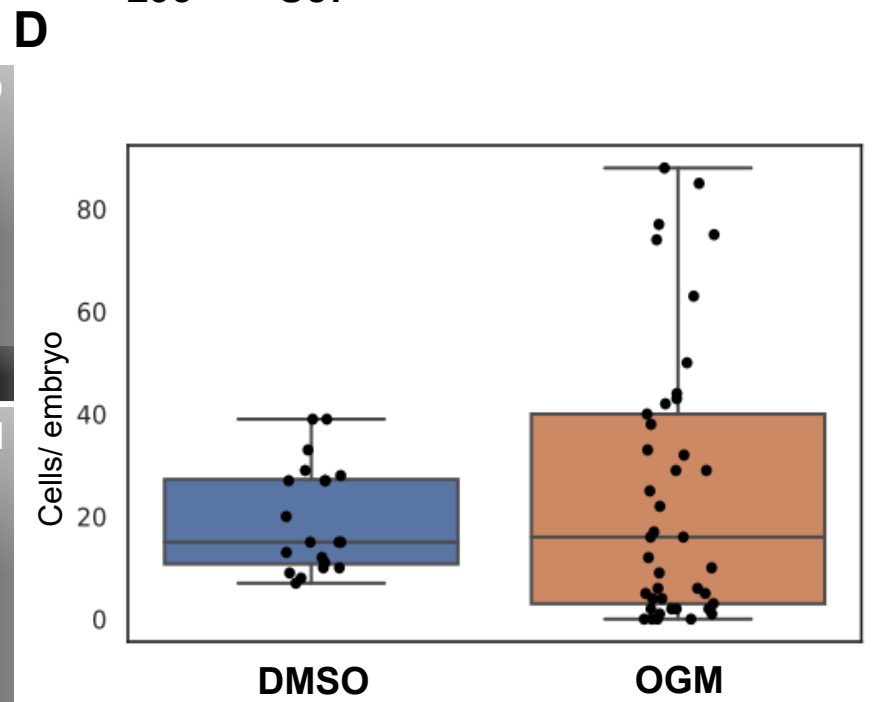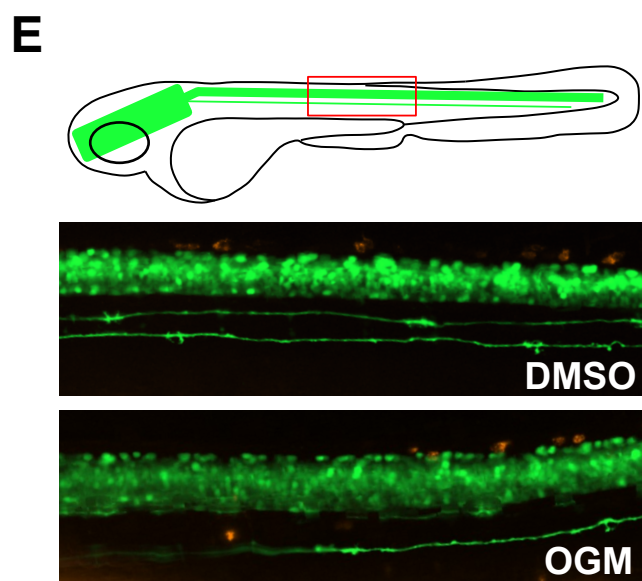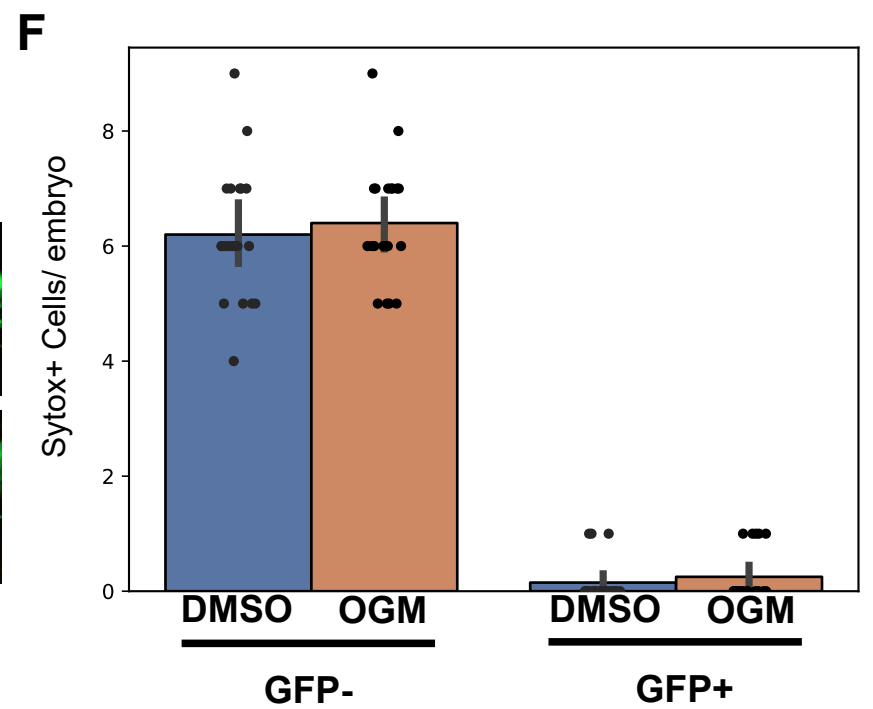



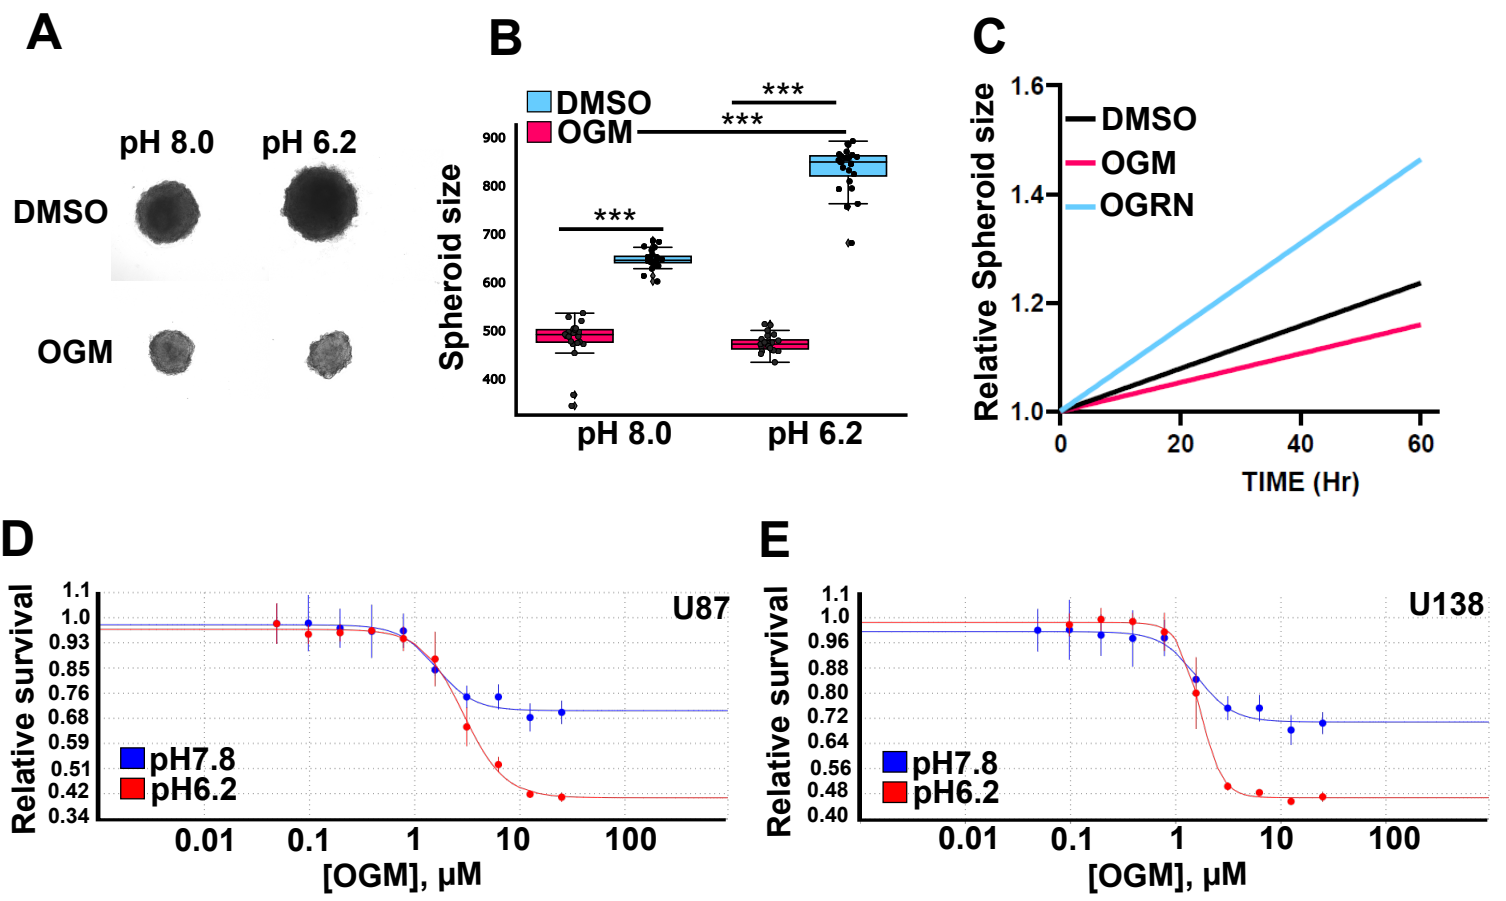

Figure S11

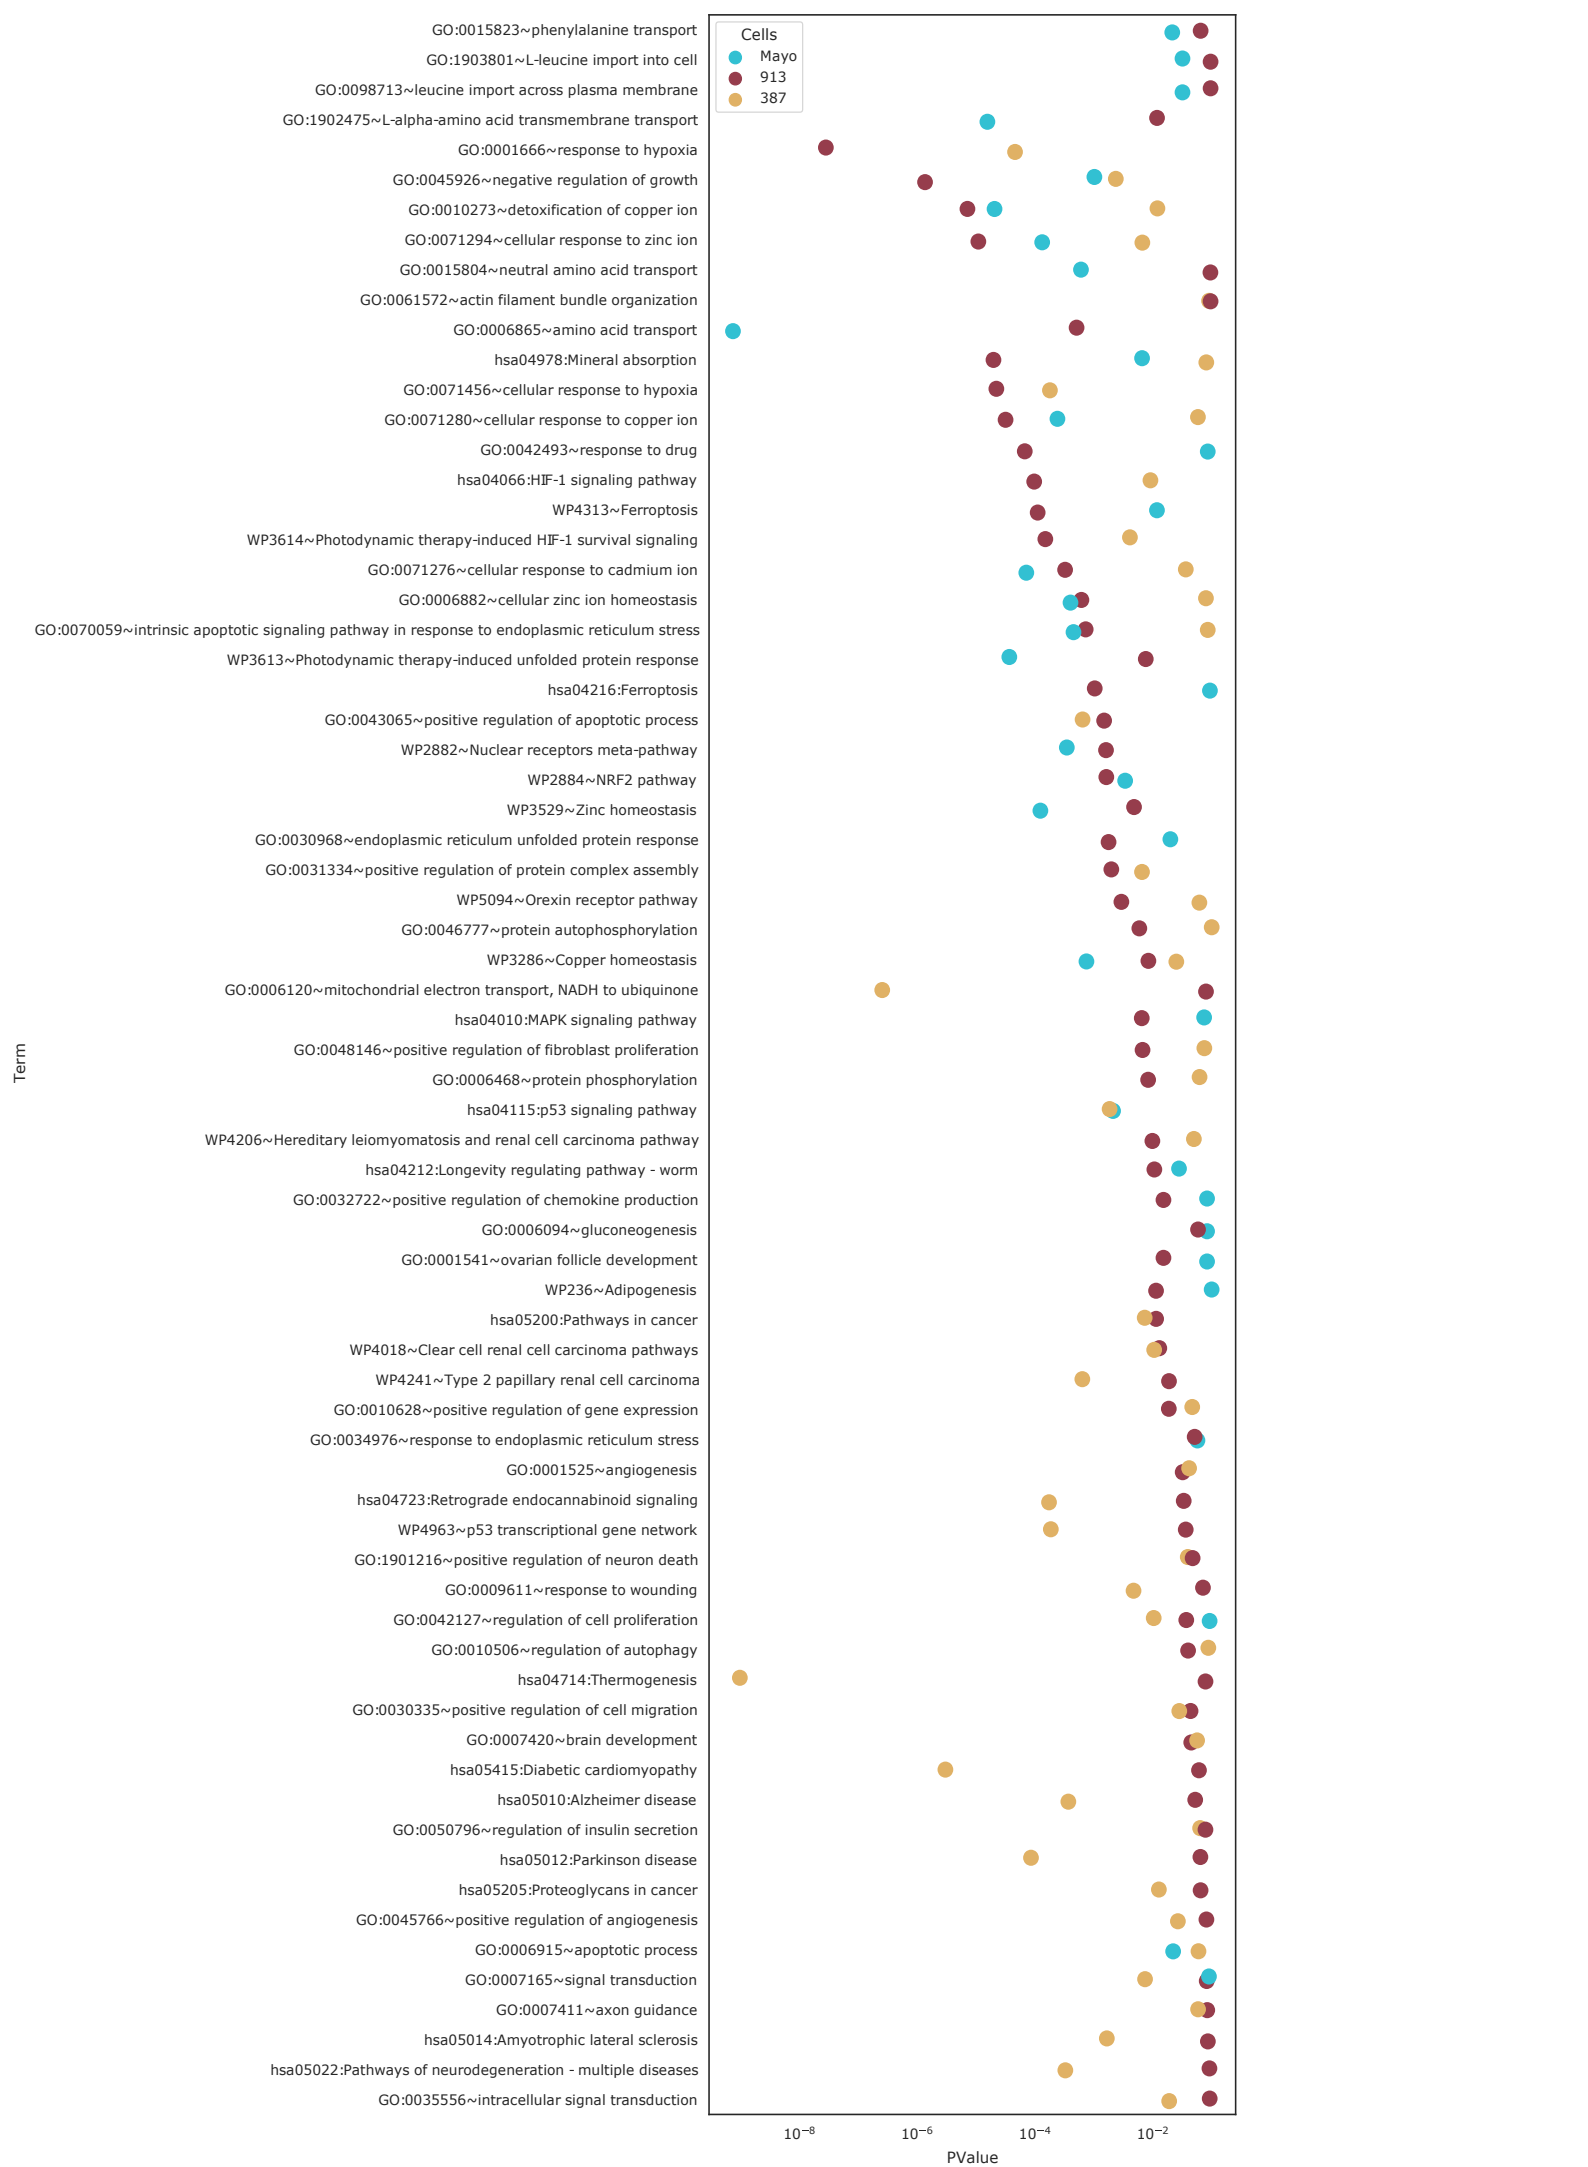

Figure S12

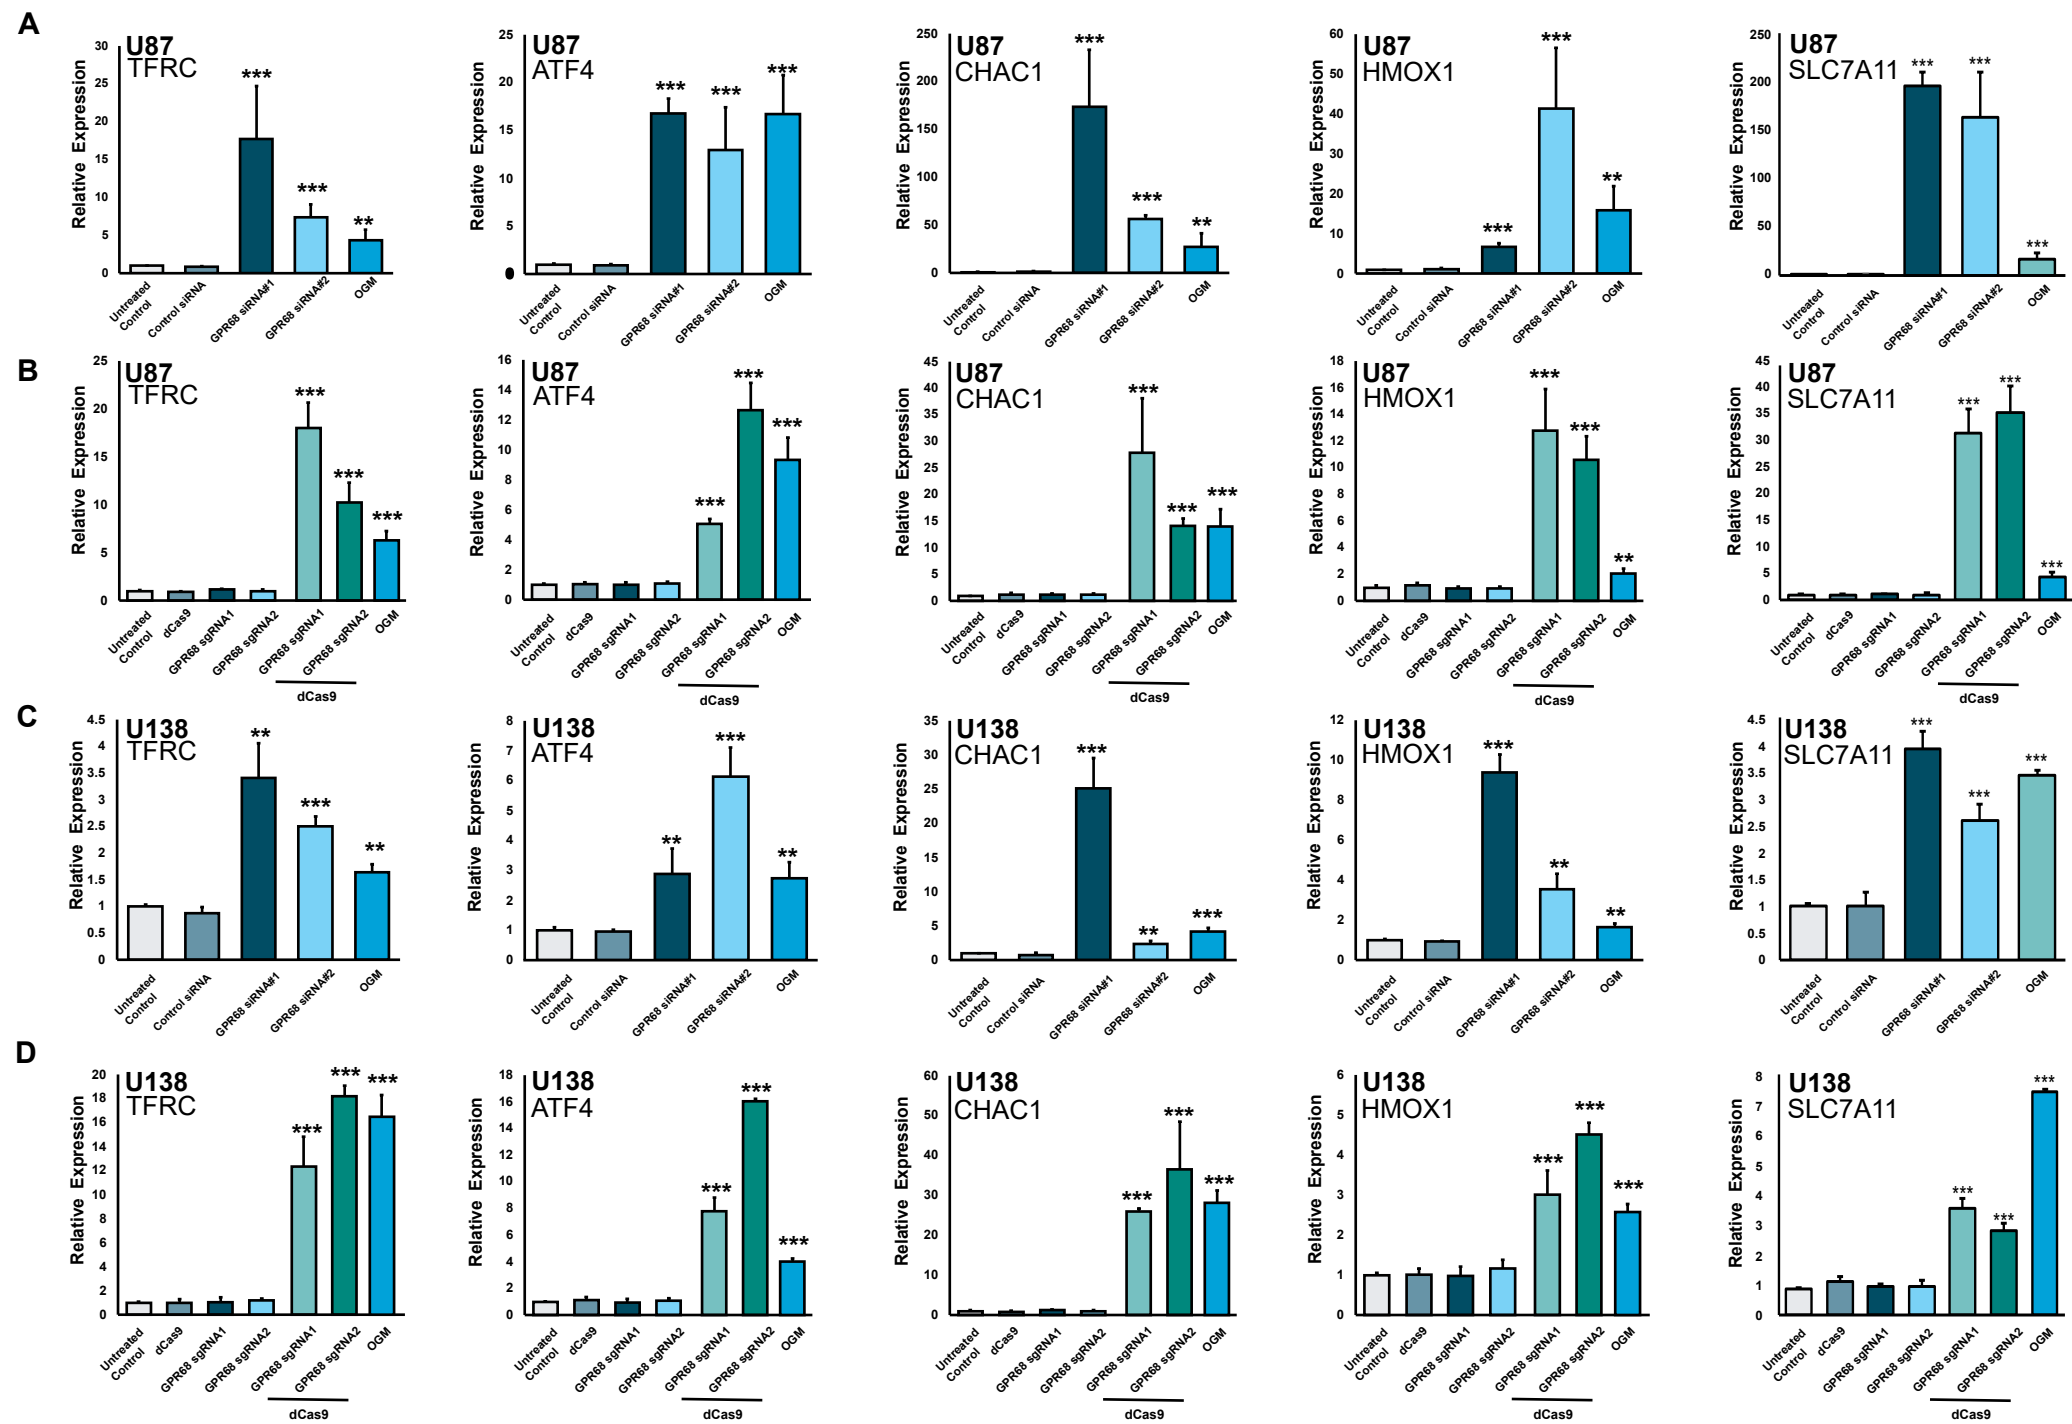

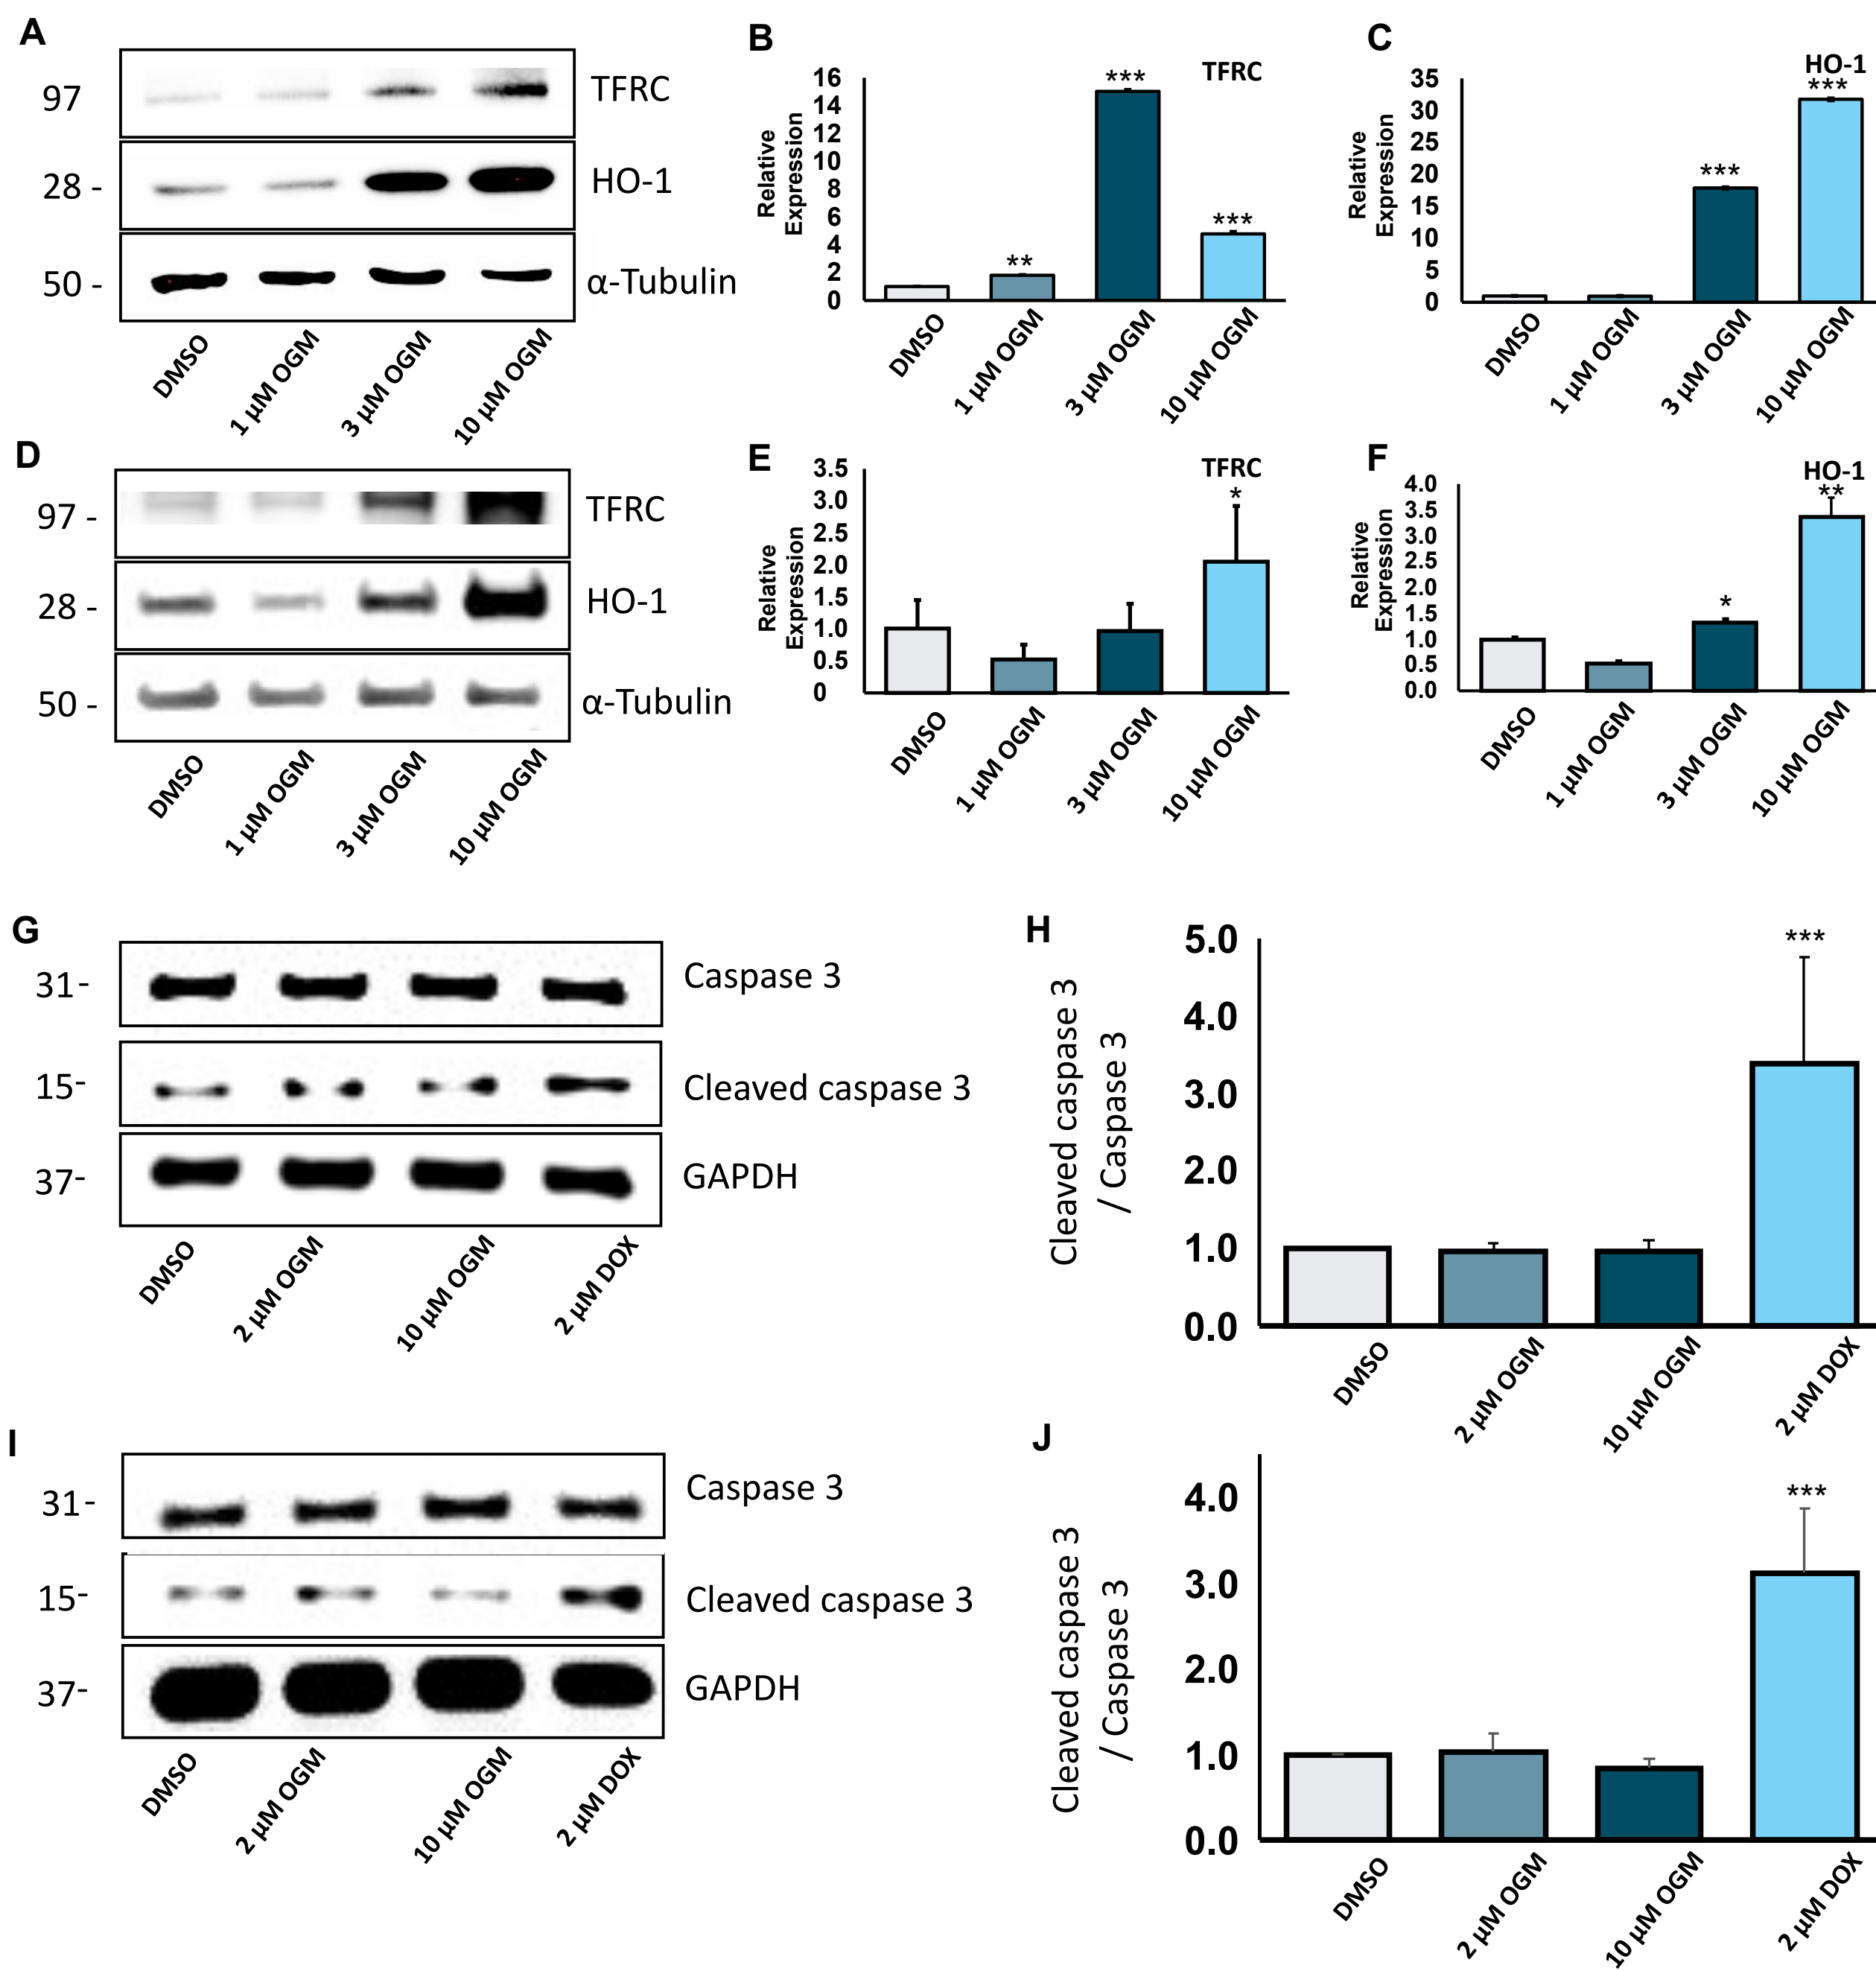

Figure S14

**A**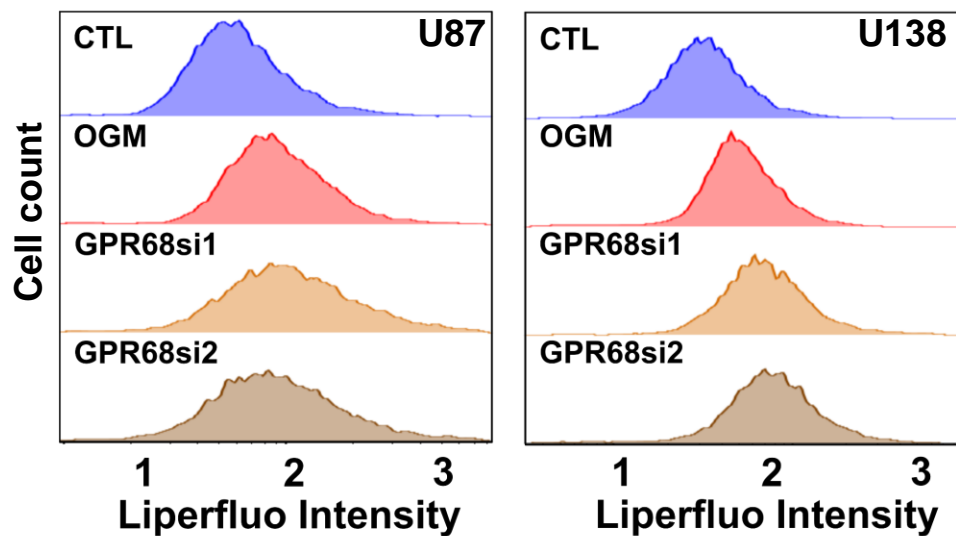**B**

| VS Control    | Chi-squared T(X) |        |
|---------------|------------------|--------|
|               | U87              | U138   |
| OGM 2 $\mu$ M | 377.9            | 540.3  |
| GPR68 si1     | 490.6            | 1012.3 |
| GPR68 si2     | 303.8            | 1140.7 |

**C**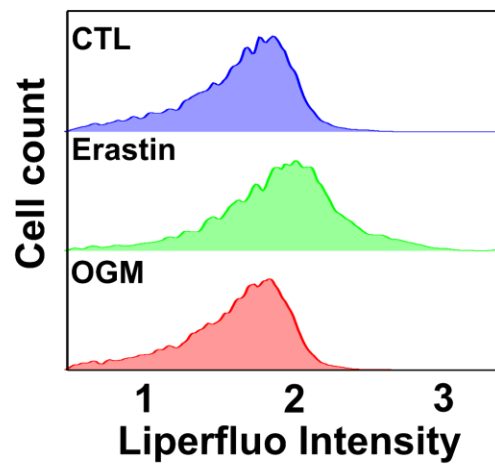

| VS Control         | Chi-squared T(X) |
|--------------------|------------------|
| Erastin 15 $\mu$ M | 310.1            |
| OGM 2 $\mu$ M      | 1.4              |

**D**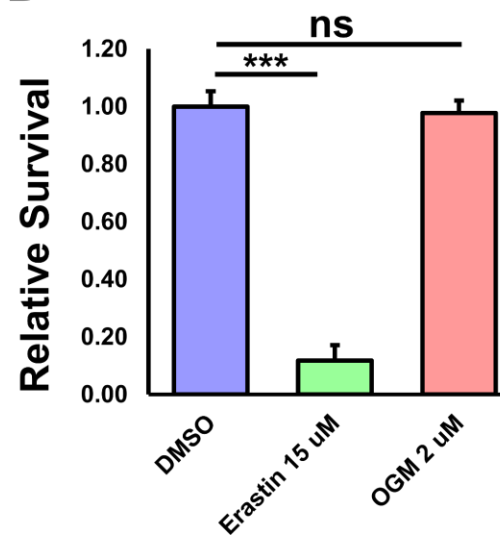

**A**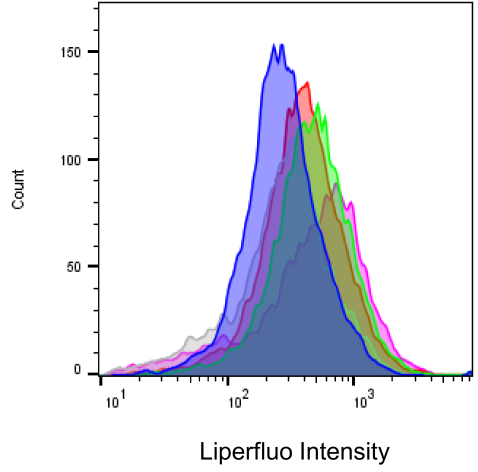**B**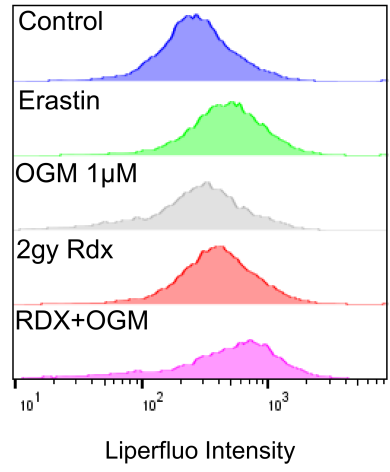**C****CDI=0.06**

| Stats                             | Chi T(X) |
|-----------------------------------|----------|
| Stained control Vs. Erastin       | 305.9    |
| Stained control Vs. OGM           | 172.8    |
| Stained control Vs. Radiation     | 60.4     |
| Stained control Vs. Radiation+OGM | 373.6    |
| Radiation Vs. Radiation+OGM       | 218.2    |
| OGM Vs. Radiation+OGM             | 135.6    |

**D**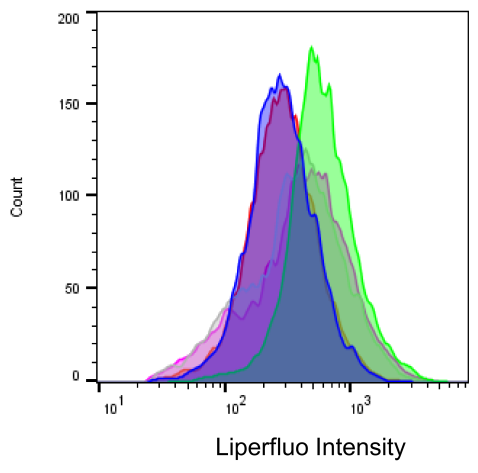**E**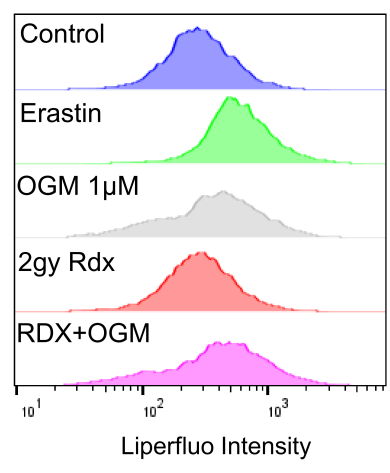**F****CDI=0.006**

| Stats                             | Chi T(X) |
|-----------------------------------|----------|
| Stained control Vs. Erastin       | 742.5    |
| Stained control Vs. OGM           | 0        |
| Stained control Vs. Radiation     | 248.2    |
| Stained control Vs. Radiation+OGM | 327.6    |
| Radiation Vs. Radiation+OGM       | 11.1     |
| OGM Vs. Radiation+OGM             | 287.6    |



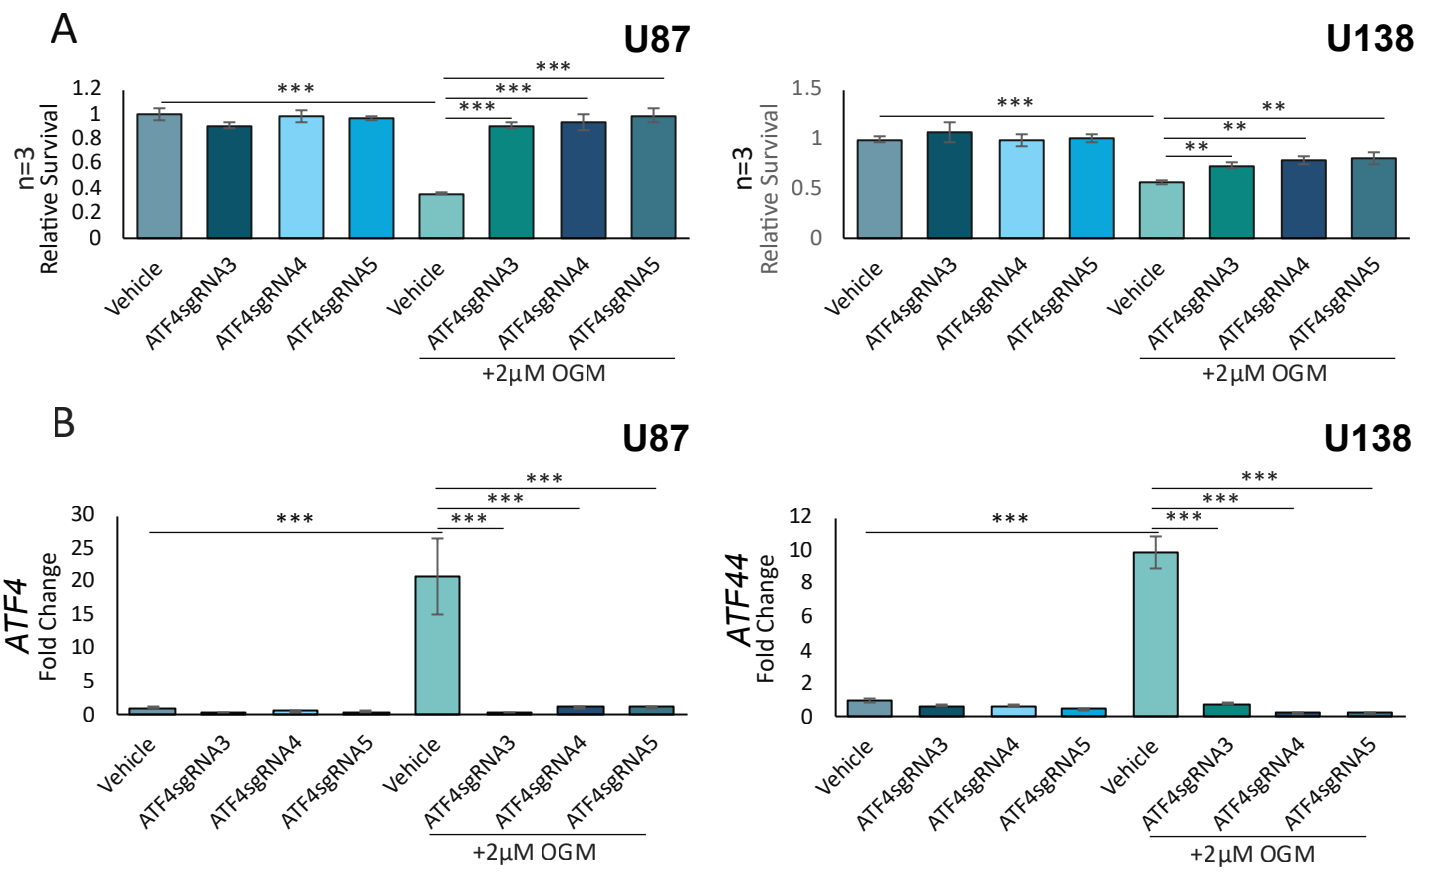

**A**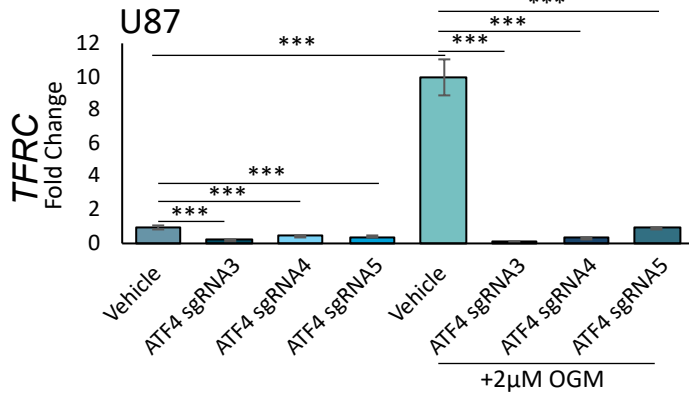**B**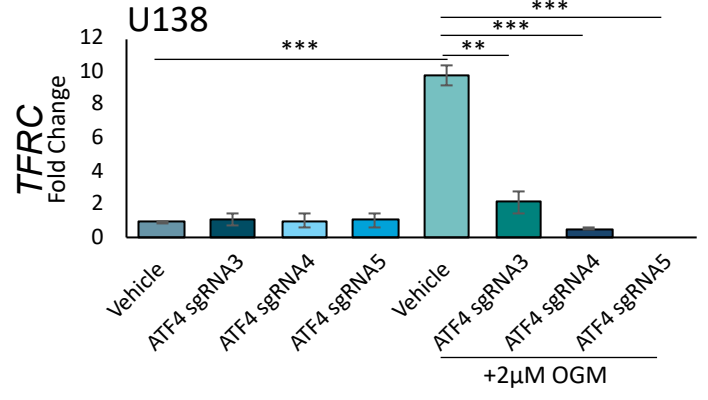**C**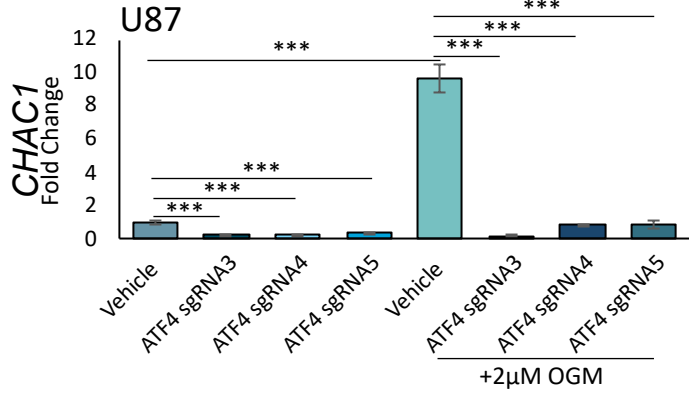**D**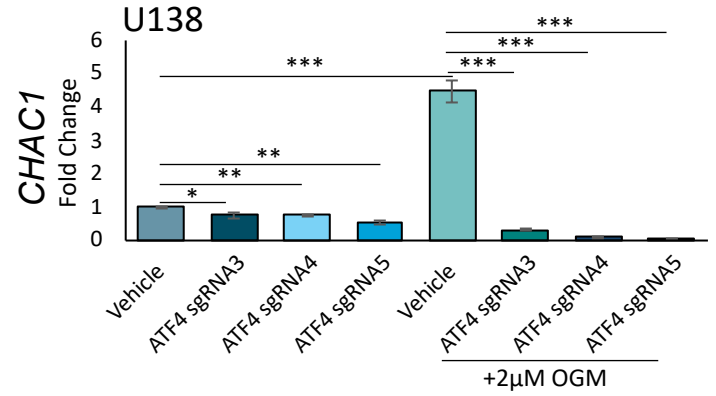**E**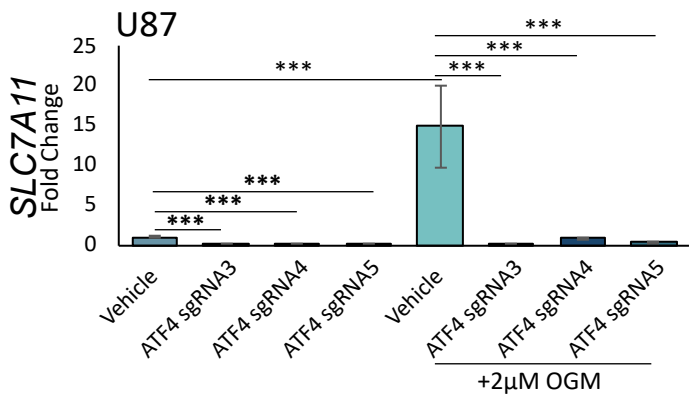**F**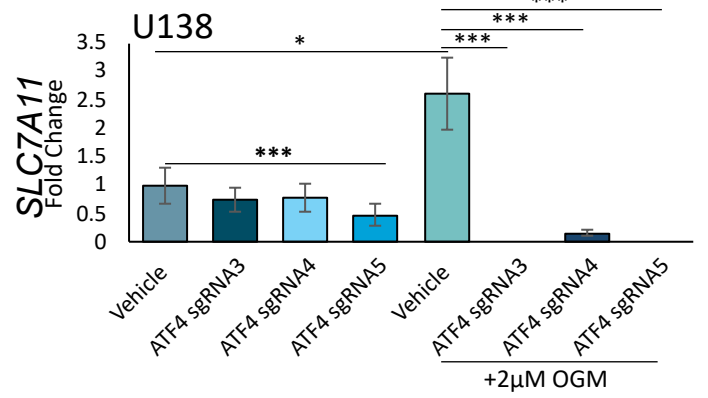**G**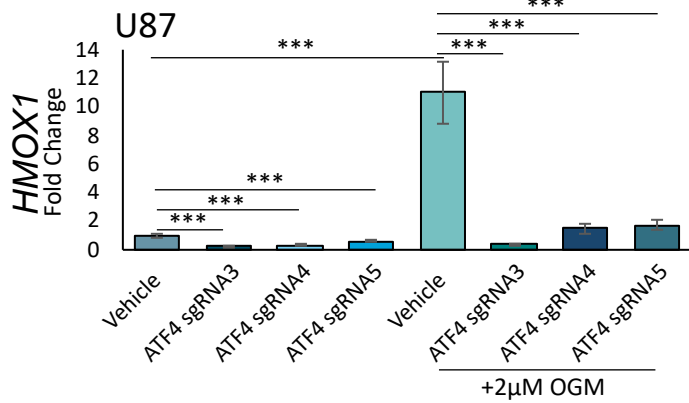**H**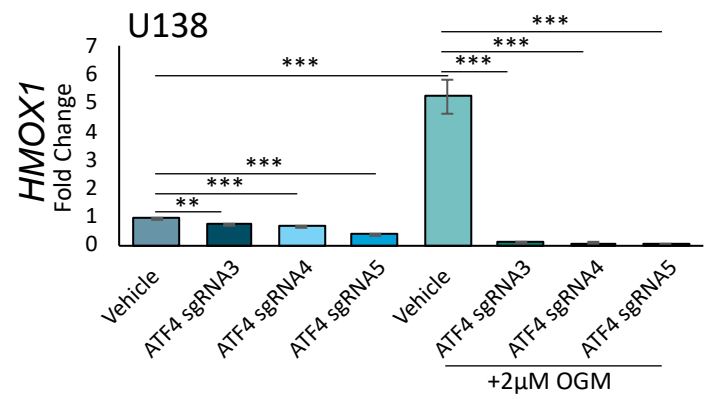

Figure S18

**A**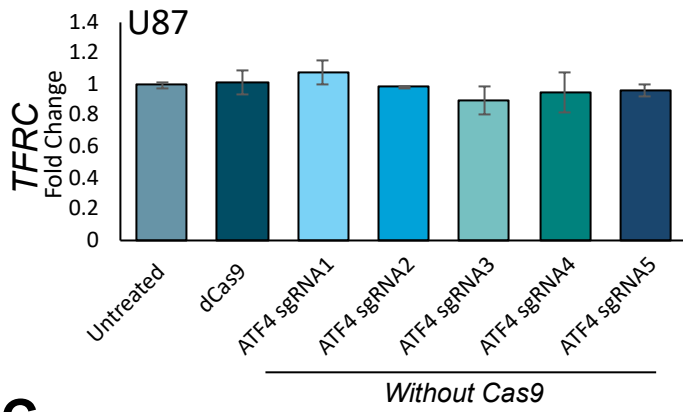**B**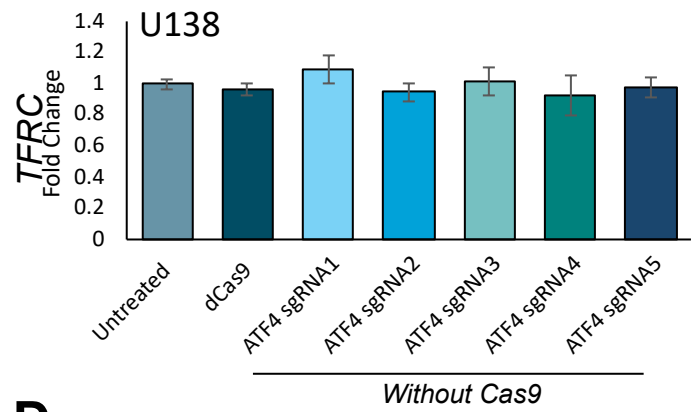**C**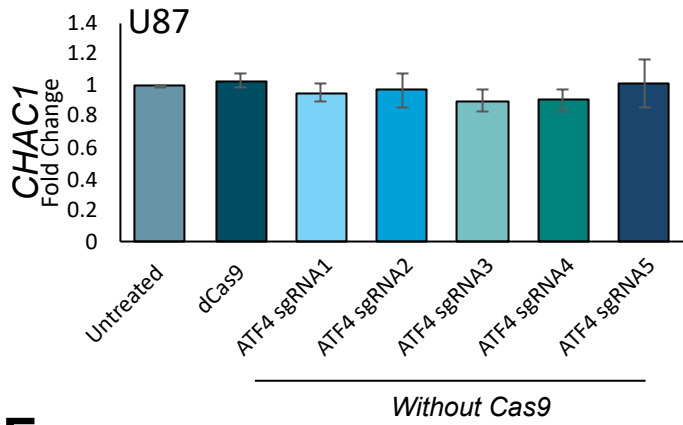**D**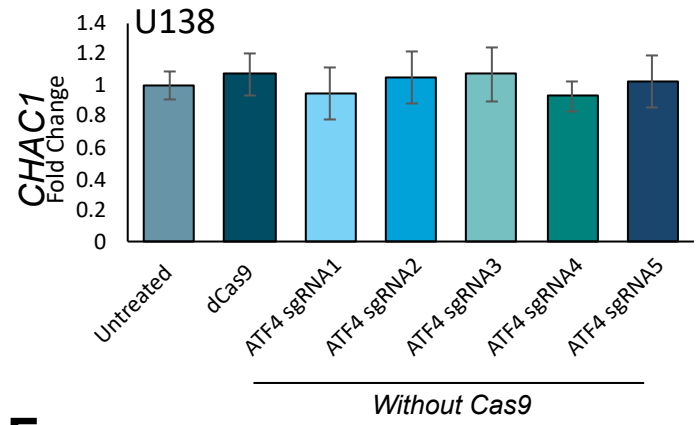**E**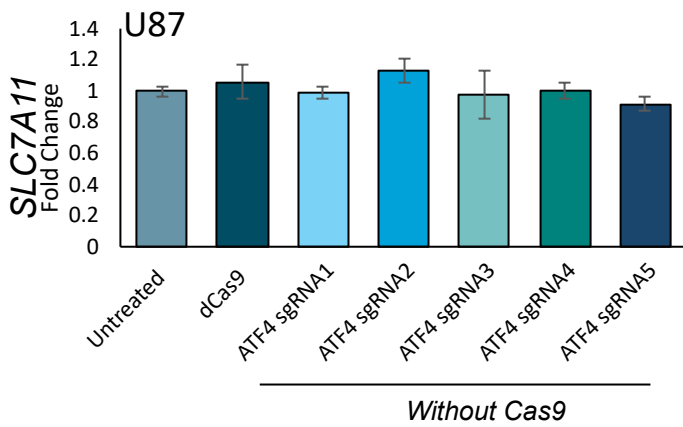**F**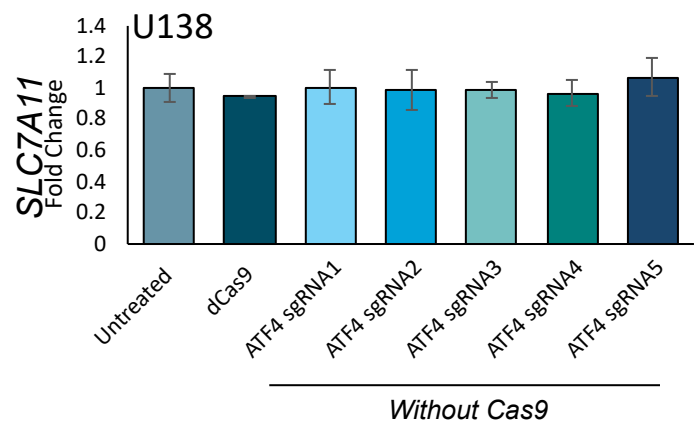**G**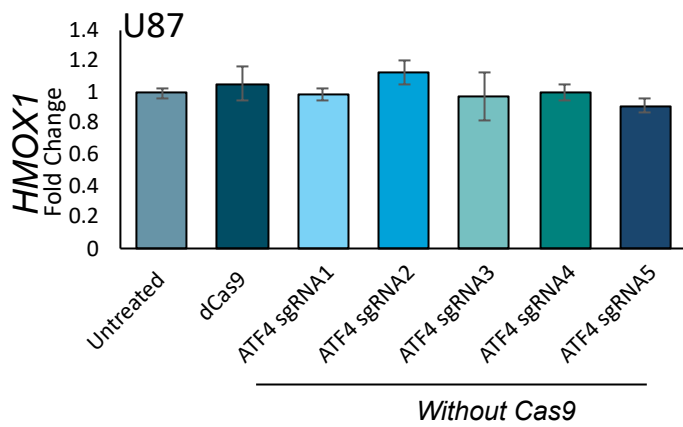**H**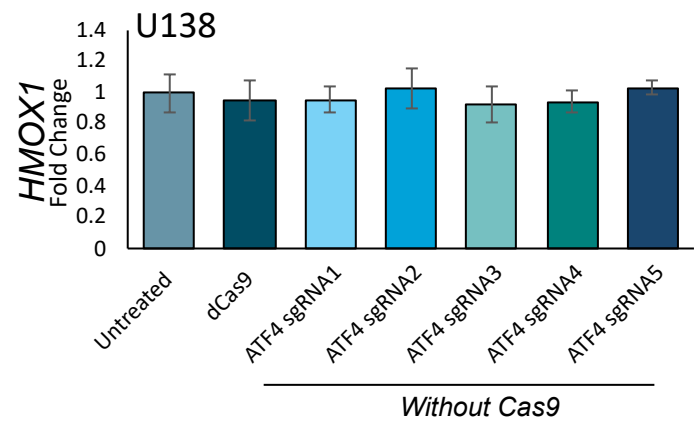

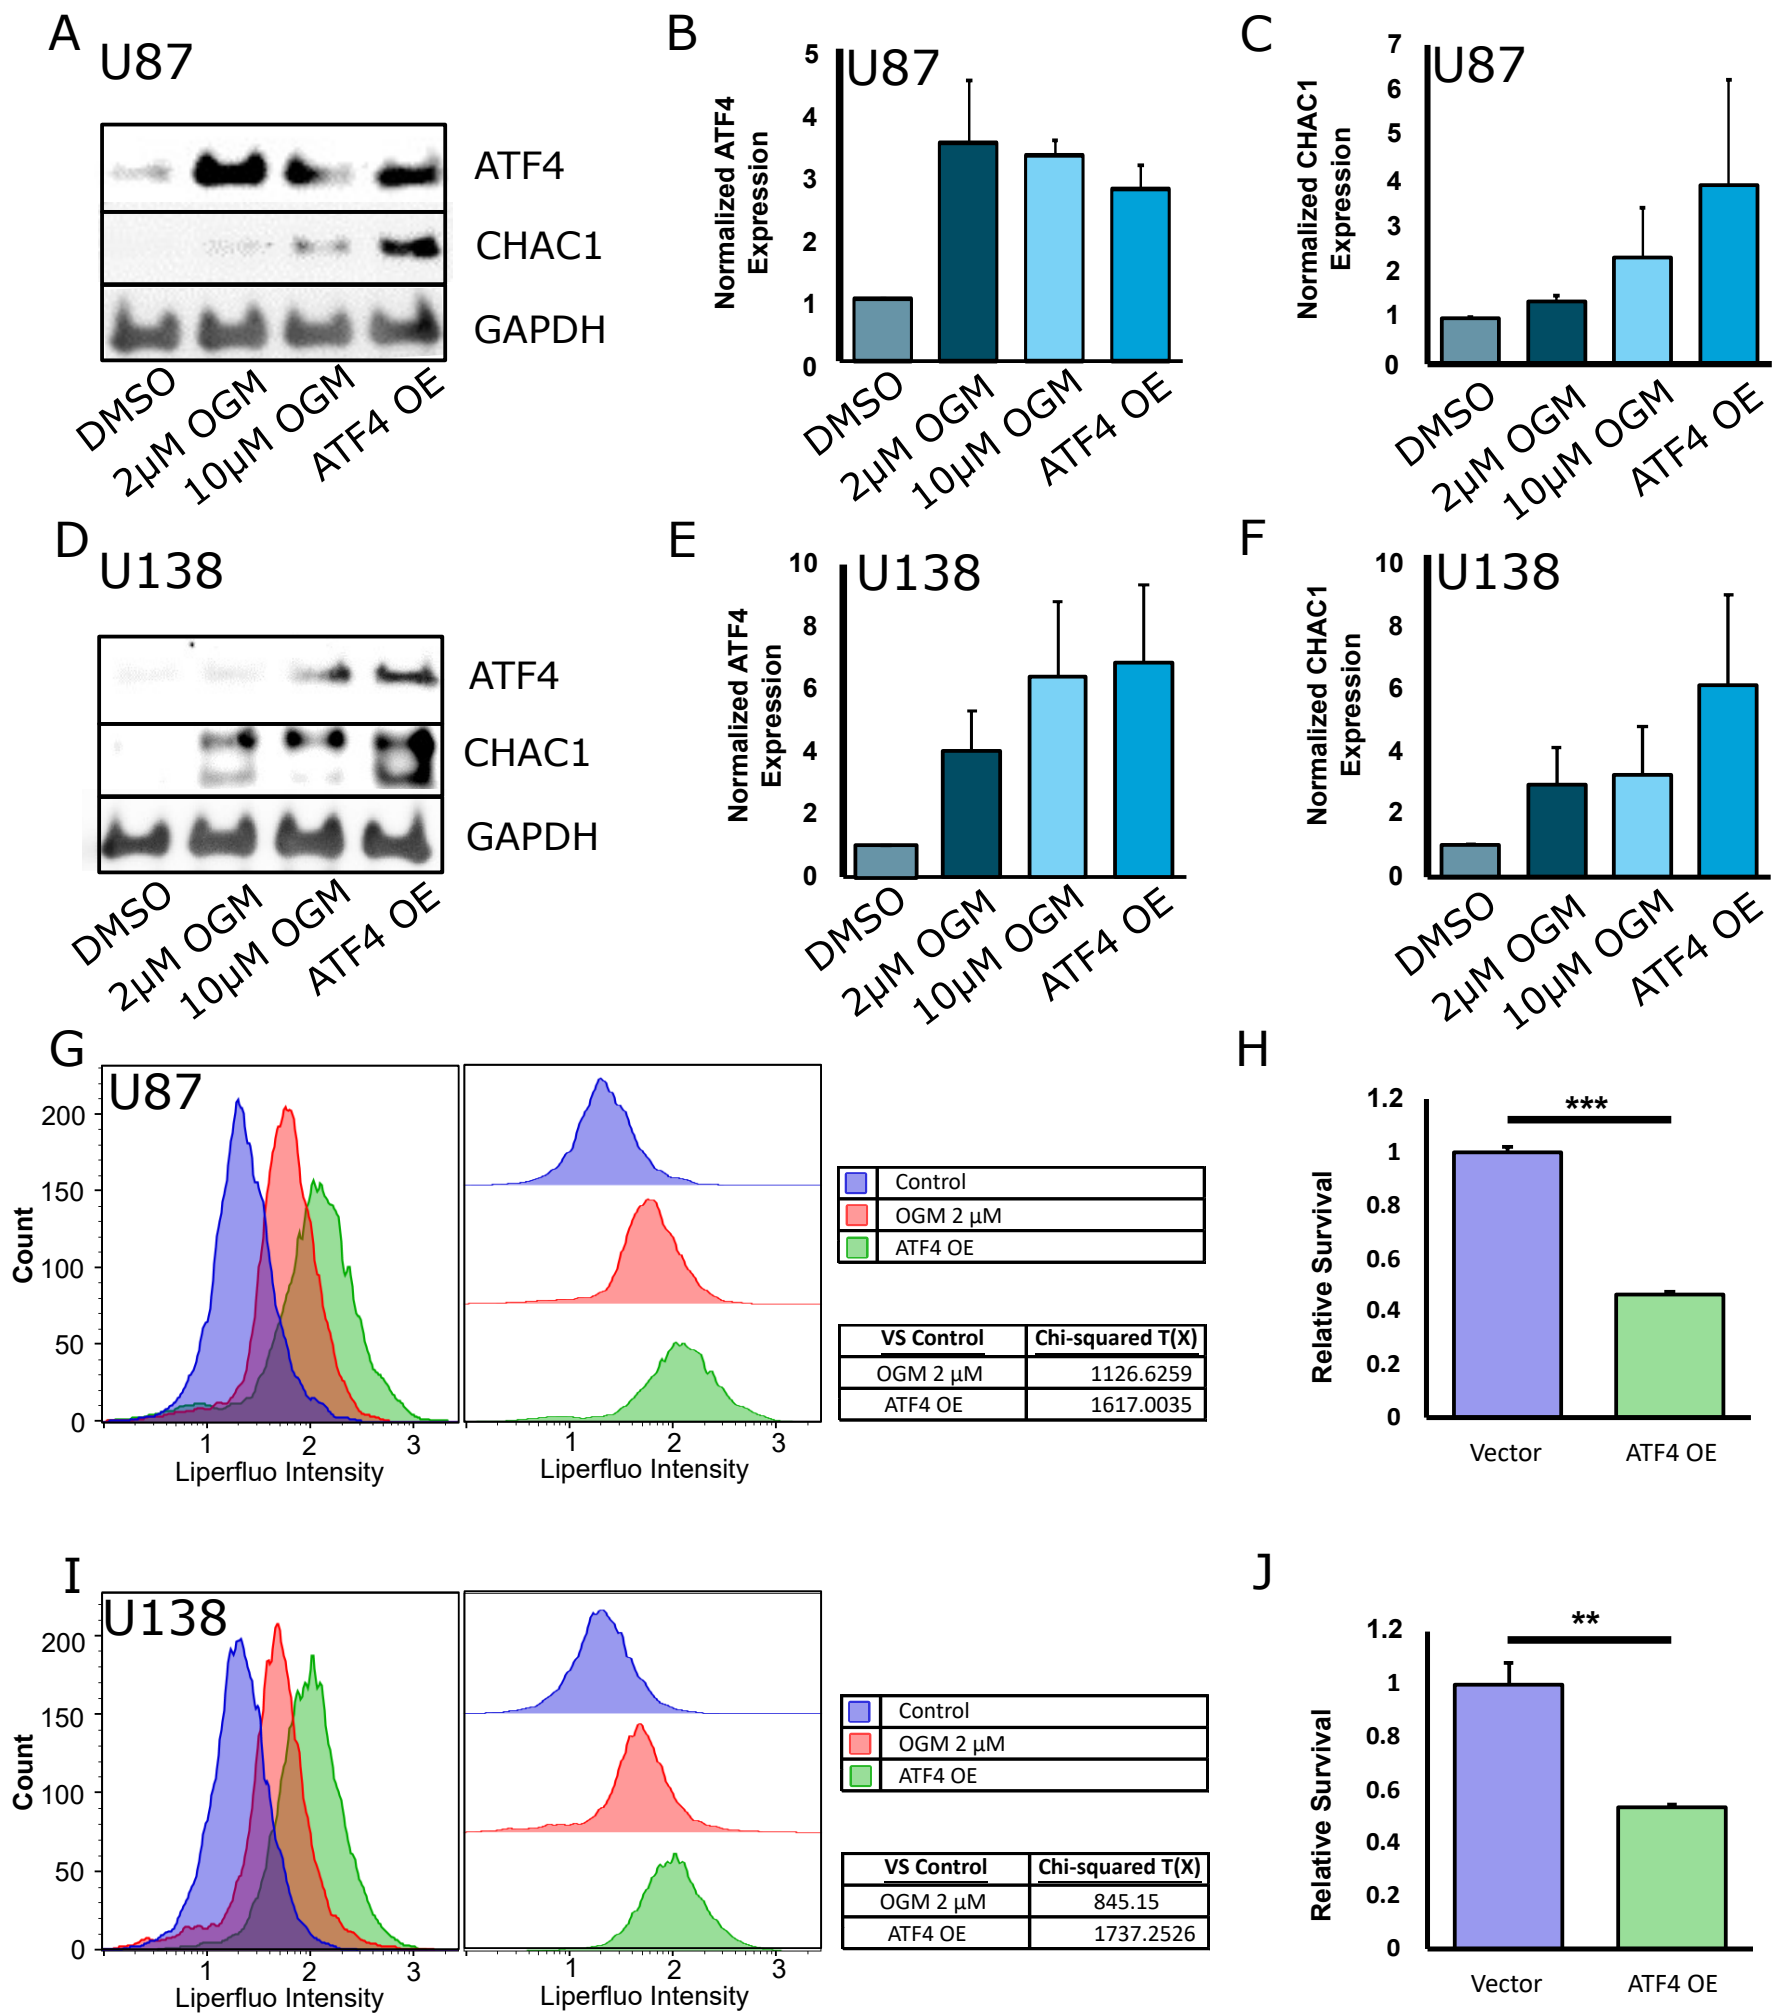

Figure S20

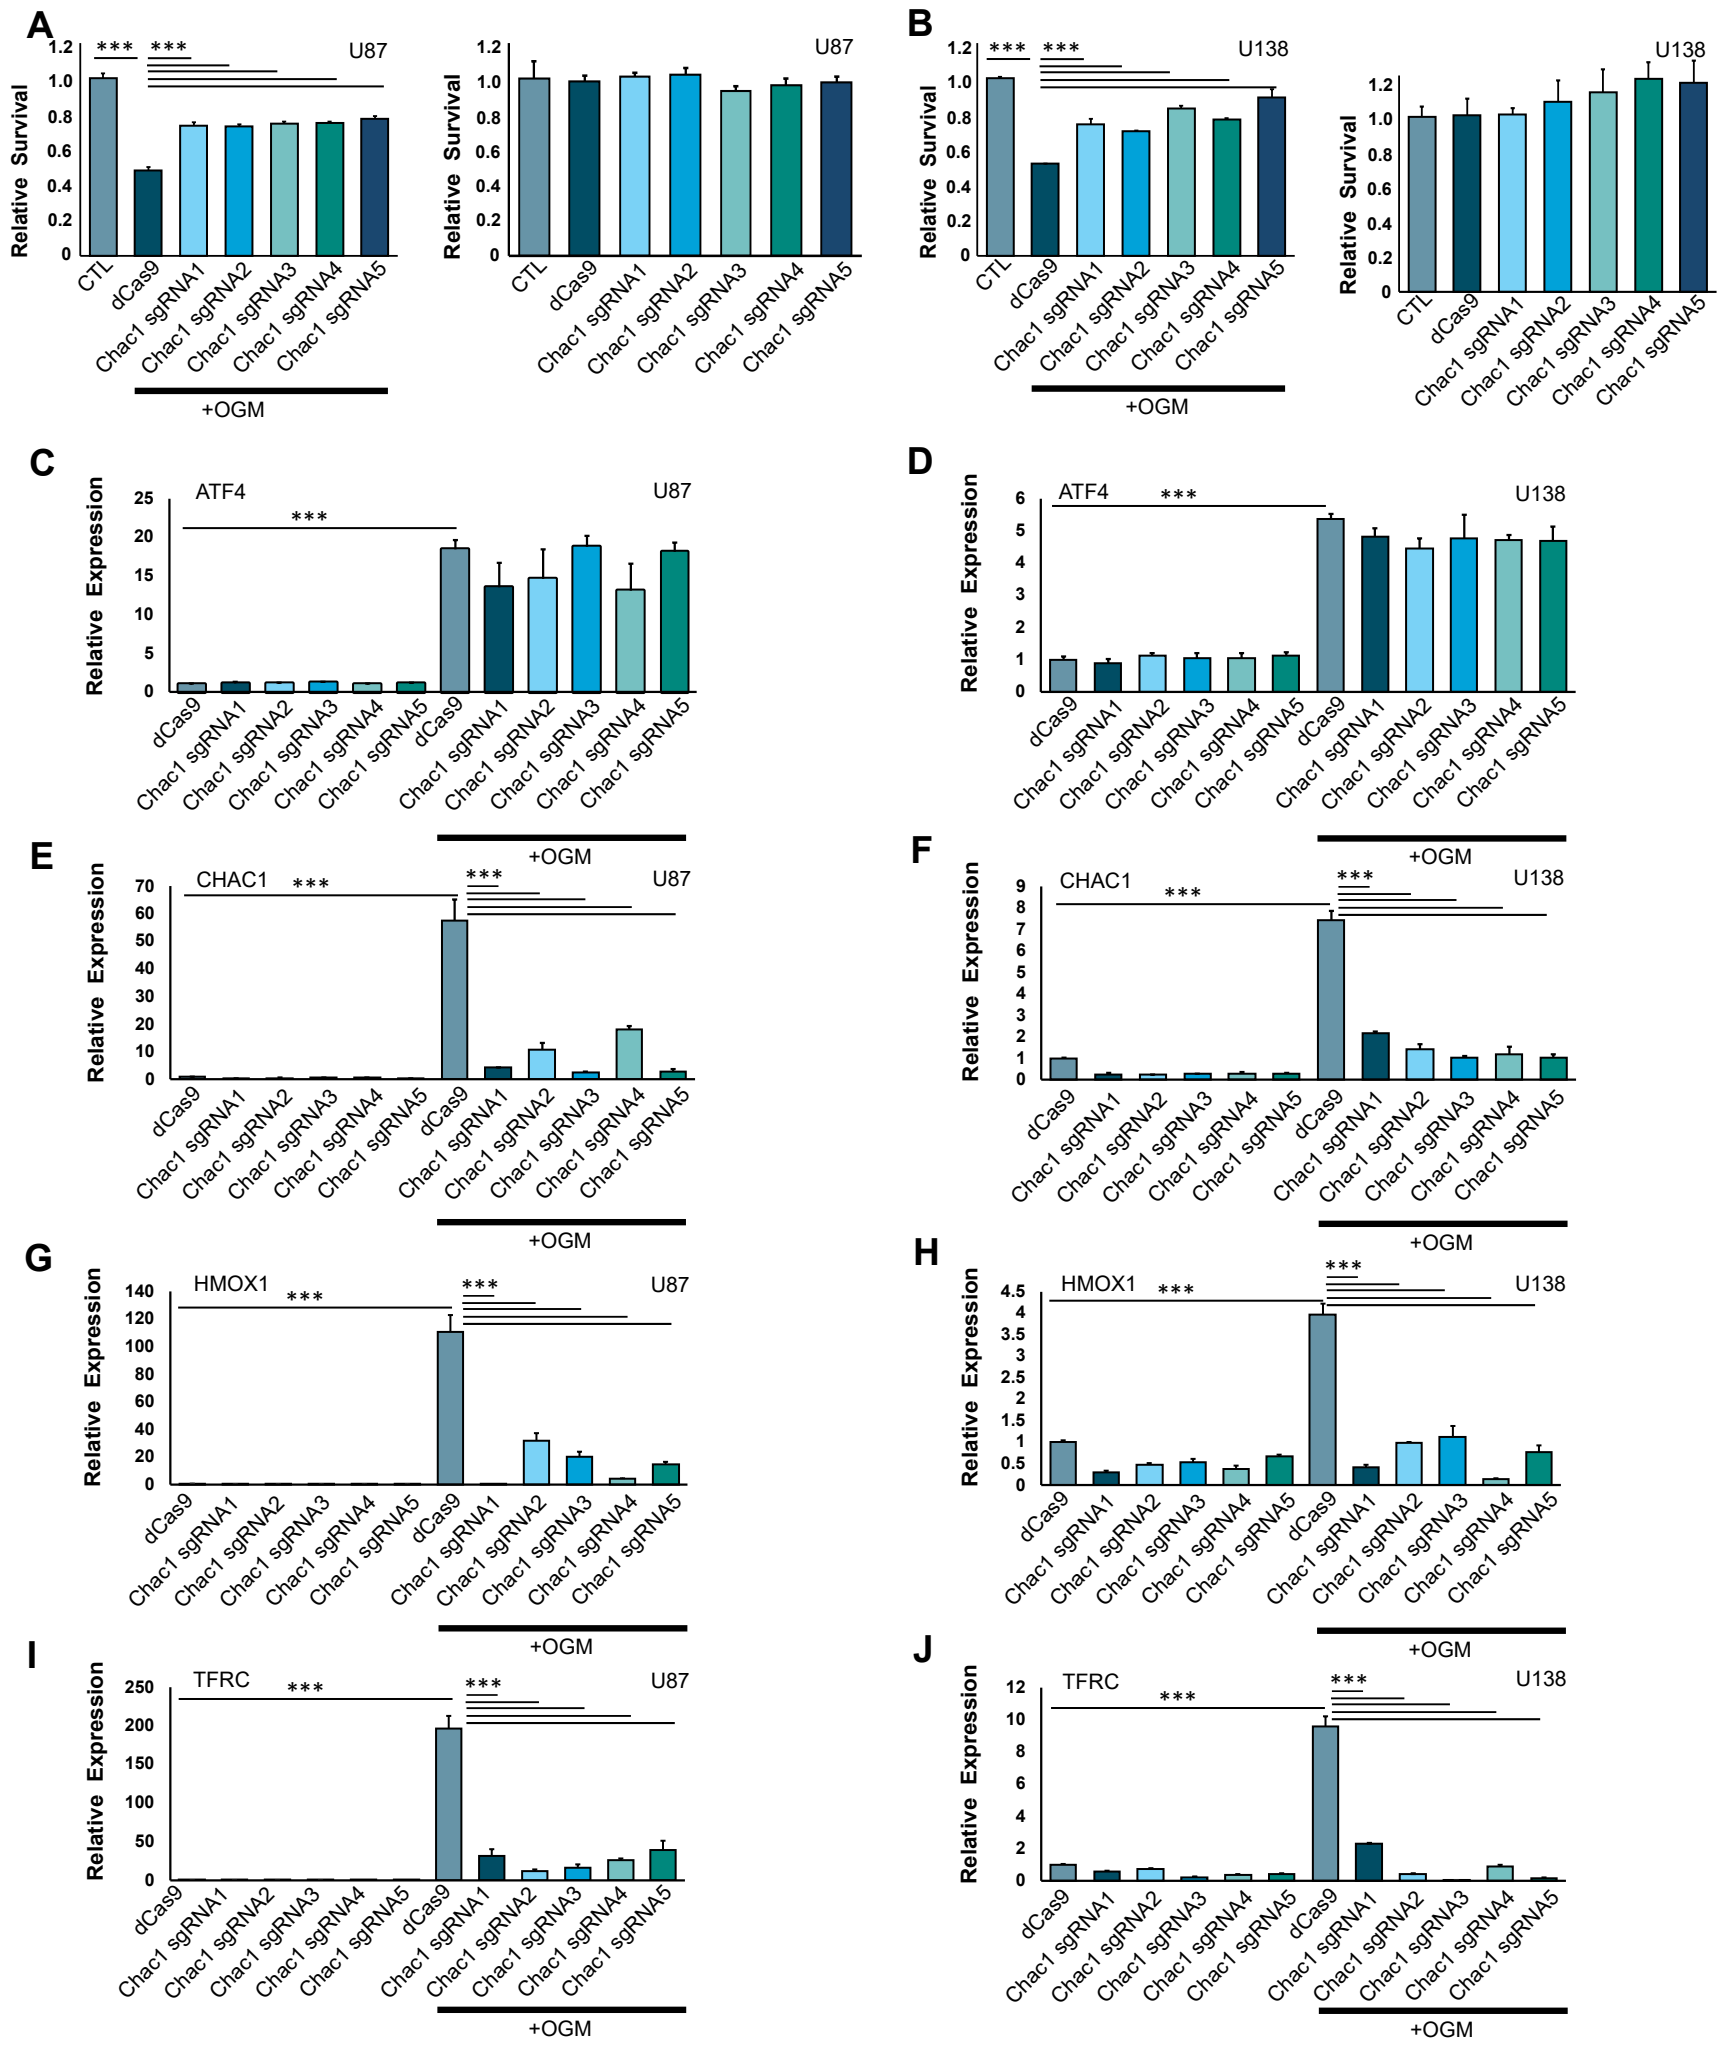

Figure S21

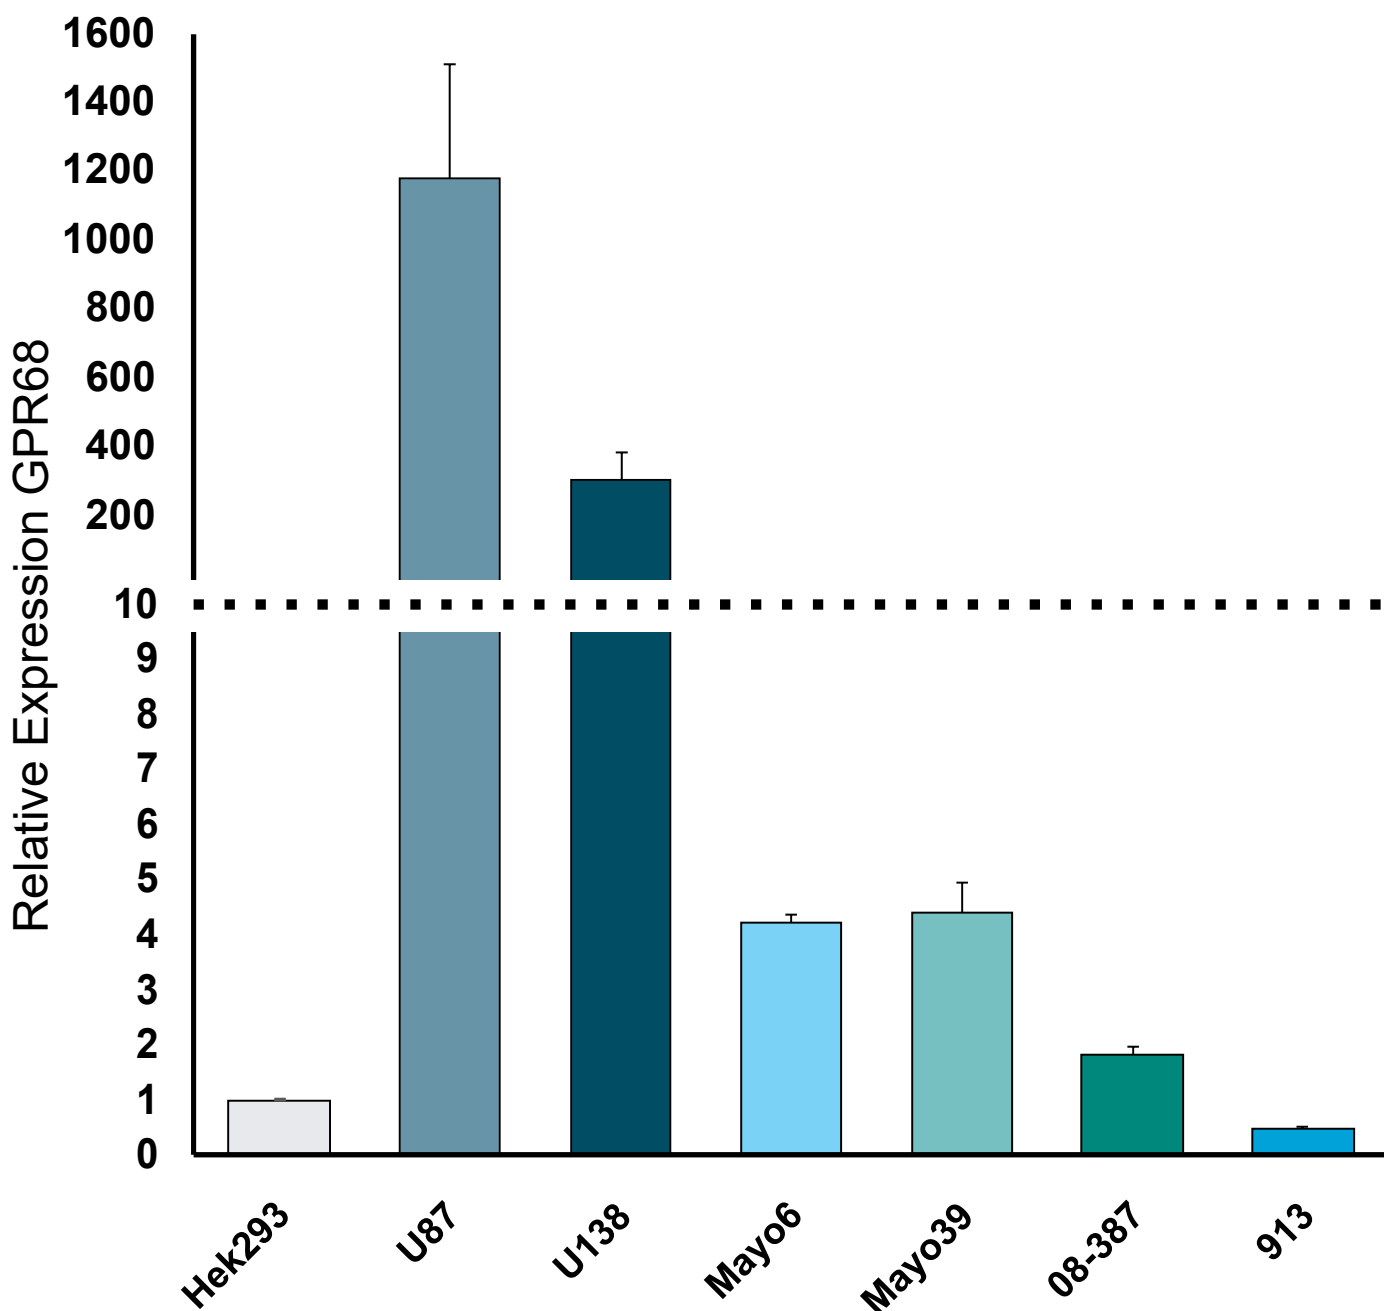

Figure S22
